# Supplementary material for: Naphtho- and anthra-disilacyclobutadienes
Source: Royal Society of Chemistry journal article supplement (doi:10.1039/d0cc06603f), 2020-01-01
Supplement: d0cc06603f1.pdf [file d0cc06603f1.pdf]

## Electronic Supplementary Information

### Naphtho- and anthra-disilacyclobutadienes

Shintaro Ishida,\* Shohei Sugawara, Shunya Honda and Takeaki Iwamoto\*

Department of Chemistry, Graduate School of Science, Tohoku University, Aoba-ku, Sendai 980-8578, Japan.

E-mail: ishida@tohoku.ac.jp, takeaki.iwamoto@tohoku.ac.jp

#### Contents

|                                                        |     |
|--------------------------------------------------------|-----|
| 1. Experimental Details .....                          | S2  |
| General Procedures .....                               | S2  |
| Materials .....                                        | S2  |
| Synthesis of Naphtodisilacyclobutadiene <b>3</b> ..... | S2  |
| Synthesis of Anthradisilacyclobutadiene <b>4</b> ..... | S3  |
| 2. NMR and UV-vis Spectra.....                         | S4  |
| 3. Single Crystal X-ray Diffraction Analysis .....     | S9  |
| 4. Theoretical Calculations .....                      | S11 |
| 4. References .....                                    | S32 |

## 1. Experimental Details

### General Procedures

All reactions treating air-sensitive compounds were carried out under an inert atmosphere (N<sub>2</sub> or Ar) using a high-vacuum line and standard Schlenk techniques, or a glove box, as well as dry and oxygen-free solvents. NMR spectra were recorded on a Bruker Avance III 500 FT NMR spectrometer. The <sup>1</sup>H NMR chemical shifts were referenced to residual <sup>1</sup>H of the solvents; C<sub>6</sub>D<sub>6</sub> (<sup>1</sup>H δ 7.16).<sup>S1</sup> The <sup>13</sup>C and <sup>29</sup>Si NMR chemical shifts were relative to Me<sub>4</sub>Si in ppm (δ 0.00). Sampling of air-sensitive compounds was carried out using a VAC NEXUS 100027 type glove box. Mass spectra were recorded on a Bruker Daltonics SolariX 9.4T. UV-vis spectra were recorded on a JASCO V-660 spectrometer. Measurement of melting point was measured on a SRS OptiMelt MPA100. Elemental analysis was performed with a J-SCIENCE LAB JM-11 at Research and Analytical Center for Giant Molecules, Graduate School of Science, Tohoku University.

### Materials

Dimethoxyethane (DME), diethylether, toluene, and hexane were dried and deoxygenated with VAC-103991 type solvent purifiers. Benzene-*d*<sub>6</sub> (C<sub>6</sub>D<sub>6</sub>) was dried with molecular sieves 3A. Disilyne **2**<sup>S2</sup> and 2,3-dibromoanthracene <sup>S3</sup> were synthesized according to literature procedures.

### Synthesis of Naphthodisilacyclobutadiene **3**

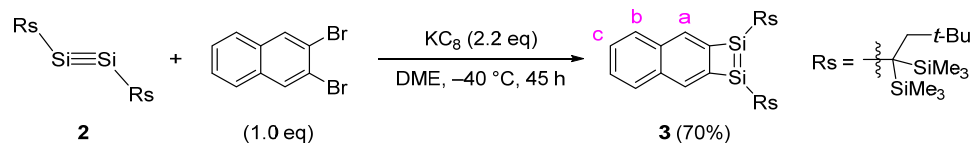

In a Schlenk tube (50 mL) equipped with a magnetic stir bar, disilyne **2** (202 mg, 392 μmol), KC<sub>8</sub> (119 mg, 879 μmol) and 2,3-dibromonaphthalene (113 mg, 394 μmol) were placed. Then, DME (6 mL) was added by vacuum transfer and stirred at -40 °C for 45 h. The reaction mixture was warmed up to 0 °C and stirred for 30 minutes. The solvent was changed to hexane (ca. 20 mL) and the insoluble material was filtrated away. Recrystallization of the crude product from Et<sub>2</sub>O at -35 °C gave compound **3** (175 mg, 273 μmol) in 70% as dark-brown powder.

**3**: dark-brown powder; mp. 65–70 °C (decomp.); <sup>1</sup>H NMR (500 MHz, C<sub>6</sub>D<sub>6</sub>, 297 K) δ 0.43 (s, 36H, SiMe<sub>3</sub>), 1.20 (s, 18H, *t*-Bu), 2.22 (s, 4H, CH<sub>2</sub>), 6.77 (s, 2H, H<sup>a</sup>), 6.97 (dd, *J* = 5.9, 3.3 Hz, 2H, H<sup>b/c</sup>), 7.15 (dd, *J* = 5.9, 3.3 Hz, 2H, H<sup>c/b</sup>); <sup>13</sup>C{<sup>1</sup>H} NMR (126 MHz, C<sub>6</sub>D<sub>6</sub>, 298 K) δ 3.6 (SiMe<sub>3</sub>), 24.1 (C(SiMe<sub>3</sub>)<sub>2</sub>), 31.4 (*t*-Bu), 34.0 (CMe<sub>3</sub>), 45.0 (CH<sub>2</sub>), 125.4 (CH), 125.8 (CH), 126.8 (CH), 137.8 (C), 155.4 (C); <sup>29</sup>Si{<sup>1</sup>H} NMR (99 MHz, C<sub>6</sub>D<sub>6</sub>, 298 K) δ 1.3 (SiMe<sub>3</sub>), 110.3 (Si=Si); HRMS (APCI) calcd for [C<sub>34</sub>H<sub>65</sub>Si<sub>6</sub>]<sup>+</sup> ([M + H]<sup>+</sup>), 641.3696; Found, 641.3697; Anal. Calcd for C<sub>34</sub>H<sub>64</sub>Si<sub>6</sub>: C, 63.67; H, 10.06%. Found: C, 63.46; H, 9.95%. UV-vis (hexane, 298 K) λ<sub>max</sub>/nm (ε) 330 (18000), 446 (5100), 460 (5600), 562 (3300).

### Synthesis of Anthradisilacyclobutadiene **4**

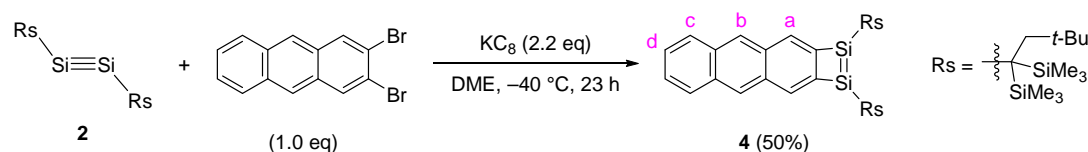

In a Schlenk tube (50 mL) equipped with a magnetic stir bar, disilyne **2** (197 mg, 382  $\mu\text{mol}$ ),  $\text{KC}_8$  (115 mg, 852  $\mu\text{mol}$ ) and 2,3-dibromoanthracene (131 mg, 391  $\mu\text{mol}$ ) were added. Then, DME (10 mL) was added via a vacuum line and stirred at  $-40\text{ }^\circ\text{C}$  for 23 h. After evaporation of volatiles at room temperature, the residue was filtrated with pentane (ca. 20 mL) by a Schlenk filter. Recrystallization from  $\text{Et}_2\text{O}$  at  $-35\text{ }^\circ\text{C}$  gave compound **4** (131 mg, 190  $\mu\text{mol}$ ) in 50% as dark-purple powder.

**4**: dark-purple powder; mp.  $140\text{--}150\text{ }^\circ\text{C}$  (decomp.);  $^1\text{H}$  NMR (500 MHz,  $\text{C}_6\text{D}_6$ , 297 K)  $\delta$  0.44 (s, 36H,  $\text{SiMe}_3$ ), 1.23 (s, 18H, *t*-Bu), 2.25 (s, 4H,  $\text{CH}_2$ ), 6.89 (s, 2H,  $\text{H}^a$ ), 7.17 (dd,  $J = 6.5, 3.2\text{ Hz}$ , 2H,  $\text{H}^{c/d}$ ), 7.52 (s, 2H,  $\text{H}^b$ ), 7.60 (dd,  $J = 6.2, 3.3\text{ Hz}$ , 2H,  $\text{H}^{d/c}$ );  $^{13}\text{C}\{^1\text{H}\}$  NMR (126 MHz,  $\text{C}_6\text{D}_6$ , 298 K)  $\delta$  3.6 ( $\text{SiMe}_3$ ), 24.0 ( $\text{C}(\text{SiMe}_3)_2$ ), 31.5 (*t*-Bu), 34.1 ( $\text{CMe}_3$ ), 45.0 ( $\text{CH}_2$ ), 123.9 (CH), 124.5 (CH), 125.4 (CH), 128.2 (CH), 133.3 (C), 136.0 (C), 155.3 (C);  $^{29}\text{Si}\{^1\text{H}\}$  NMR (99 MHz,  $\text{C}_6\text{D}_6$ , 298 K)  $\delta$  1.5 ( $\text{SiMe}_3$ ), 105.0 (Si=Si); HRMS (APCI) calcd for  $[\text{C}_{38}\text{H}_{66}\text{Si}_6]^+$  ( $[\text{M} + \text{H}]^+$ ), 690.37746; Found, 690.37787; Anal. Calcd for  $\text{C}_{38}\text{H}_{66}\text{Si}_6$ : C, 66.01; H, 9.62%. Found: C, 65.70; H, 9.61%.; UV-vis (hexane, 298 K)  $\lambda_{\text{max}}/\text{nm}$  ( $\epsilon$ ) 375 (9400), 508 (3000), 532 (3200).

## 2. NMR and UV-vis Spectra

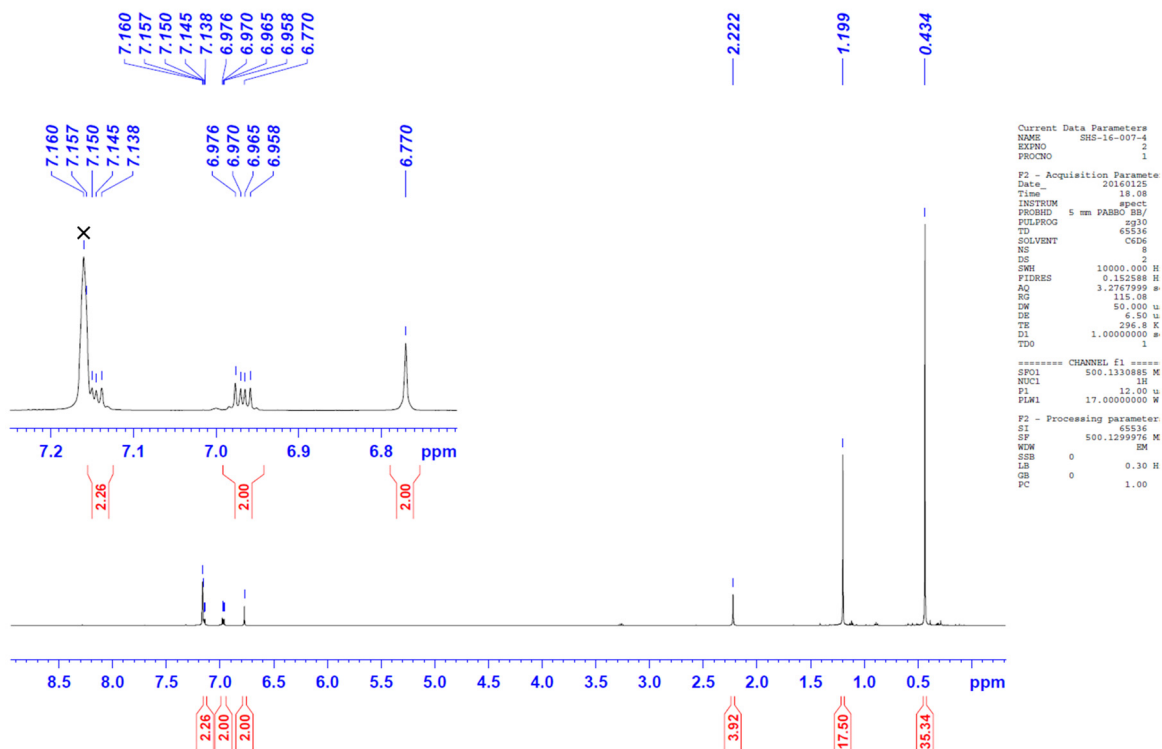

Fig. S1  $^1\text{H}$  NMR spectrum of **3** (in  $\text{C}_6\text{D}_6$ , 297 K). ( $\times = \text{C}_6\text{D}_5\text{H}$ ).

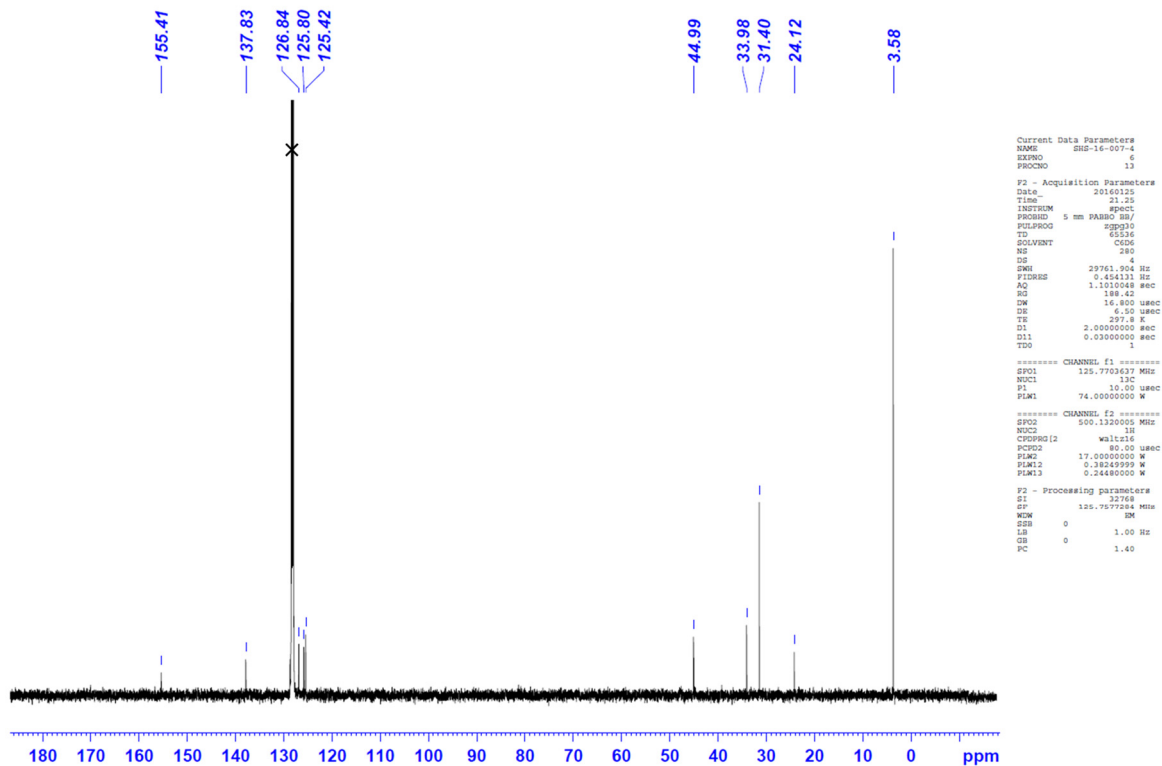

Fig. S2  $^{13}\text{C}\{^1\text{H}\}$  NMR spectrum of **3** (in  $\text{C}_6\text{D}_6$ , 298 K). ( $\times = \text{C}_6\text{D}_6$ ).

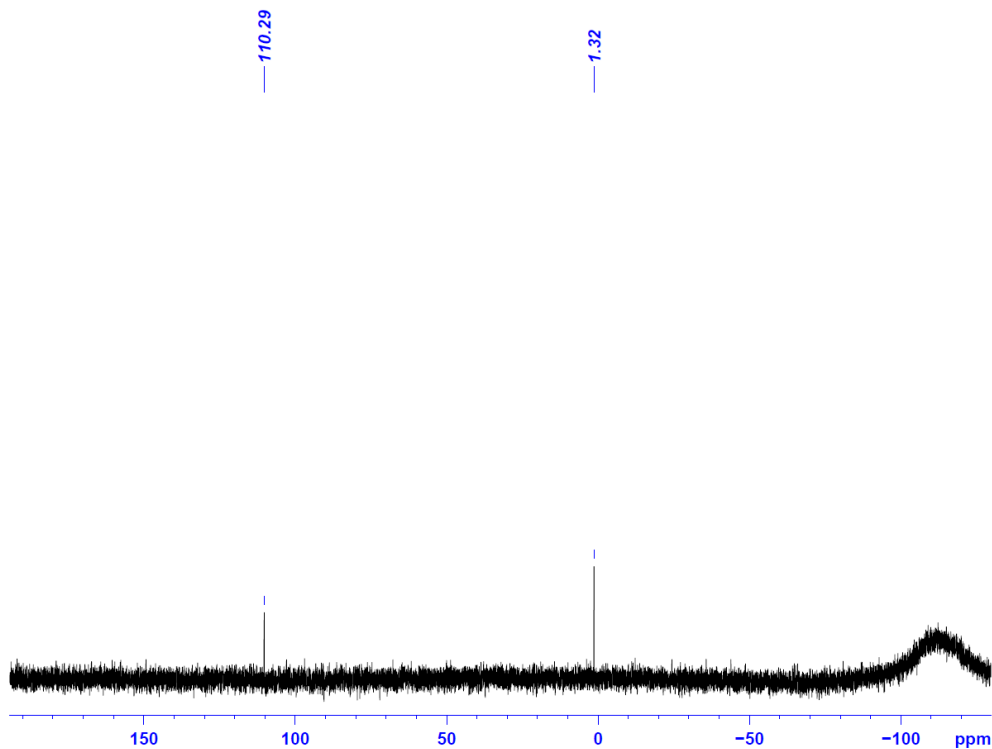

Fig. S3  $^{29}\text{Si}\{^1\text{H}\}$  NMR spectrum of **3** (in  $\text{C}_6\text{D}_6$ , 298 K).

```

Current Data Parameters
NAME      SHS-16-008-3
EXPNO    2
PROCNO   29

F2 - Acquisition Parameters
Date_    20160226
Time     14.11
INSTRUM  spect
PROBHD   5 mm PABBO BBO/
PULPROG  zgpg30
TD        65536
SOLVENT  CDCl3
NS        140
DS        4
SWH       39860.339 Hz
FIDRES    0.605507 Hz
AQ        0.8257636 sec
RG         189.42
DM         12.600 usec
DE         6.50 usec
TE        297.6 K
D1         10.0000000 sec
D11        0.0300000 sec
TD0        1

===== CHANNEL f1 =====
SFO1      99.3617620 MHz
NUC1       29Si
P1         11.90 usec
PLW1       74.0000000 W

===== CHANNEL f2 =====
SFO2      500.1320023 MHz
NUC2       1H
PCPD2[2]  wait4s
PCPD2     80.00 usec
PLW2      17.0000000 W
PLW12     0.38249999 W

F2 - Processing parameters
SI         2048
SF         99.3617236 MHz
WDW        EM
SSB         0
LB          1.00 Hz
GB          0
PC          1.40

```

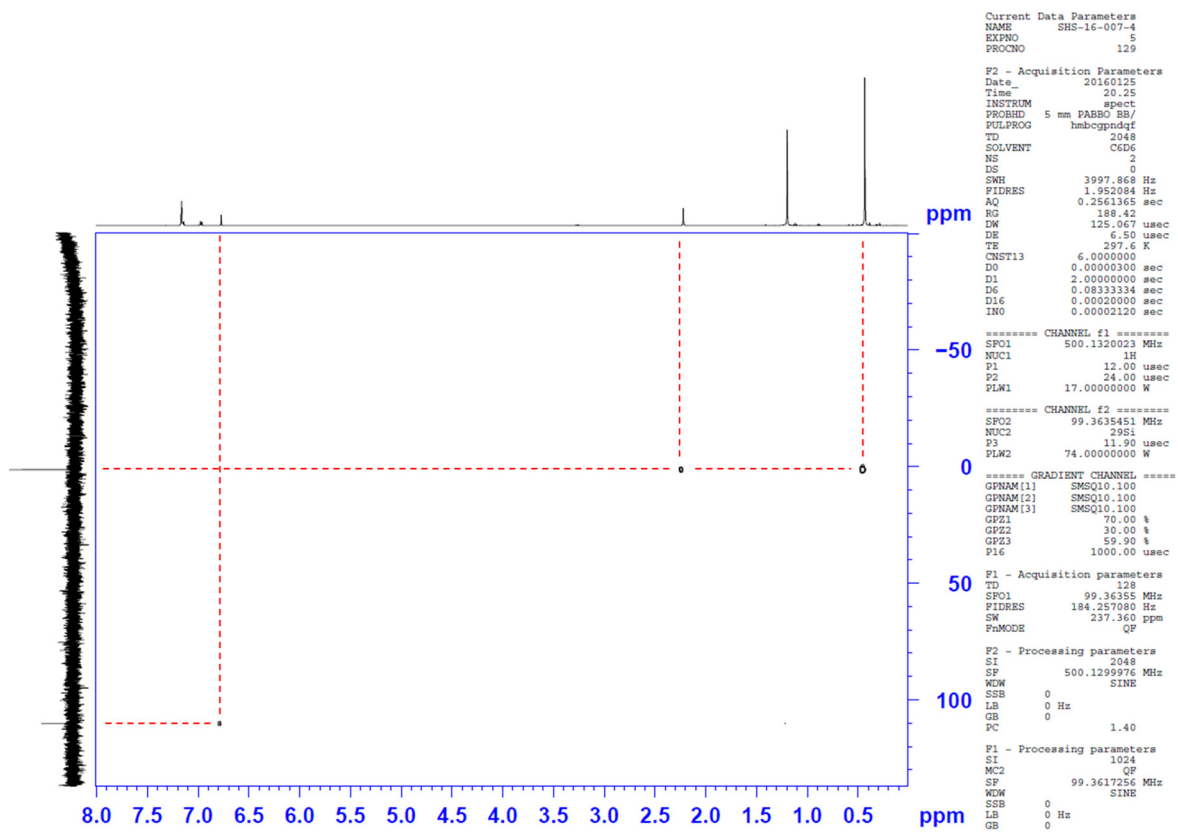

```

Current Data Parameters
NAME      SHS-16-007-4
EXPNO    5
PROCNO   129

F2 - Acquisition Parameters
Date_    20160125
Time     20.25
INSTRUM  spect
PROBHD   5 mm PABBO BBO/
PULPROG  hmbcgpndqf
TD        2048
SOLVENT  CDCl3
NS         2
DS         0
SWH       3997.868 Hz
FIDRES    1.952084 Hz
AQ        0.2561365 sec
RG         189.42
DM         125.067 usec
DE         6.50 usec
TE        297.6 K
CNST13    6.0000000
D0         0.00000300 sec
D1         2.00000000 sec
D6         0.08333334 sec
D16        0.00020000 sec
IN0        0.00002120 sec

===== CHANNEL f1 =====
SFO1      500.1320023 MHz
NUC1       1H
P1         12.00 usec
P2         24.00 usec
PLW1       17.0000000 W

===== CHANNEL f2 =====
SFO2      99.3635451 MHz
NUC2       29Si
P3         11.90 usec
PLW2       74.0000000 W

===== GRADIENT CHANNEL =====
GPNAM[1]  SMSQ10.100
GPNAM[2]  SMSQ10.100
GPNAM[3]  SMSQ10.100
GPZ1      70.00 %
GPZ2      30.00 %
GPZ3      59.90 %
P16       1000.00 usec

F1 - Acquisition parameters
SI         128
SF         99.36355 MHz
FIDRES    184.257080 Hz
SW        237.360 ppm
FAMODE    QF

F2 - Processing parameters
SI         2048
SF         500.1299976 MHz
WDW        SINE
SSB         0
LB          0 Hz
GB          0
PC          1.40

F1 - Processing parameters
SI         1024
MC2       QF
SF         99.3617256 MHz
WDW        SINE
SSB         0
LB          0 Hz
GB          0

```

Fig. S4  $^1\text{H}-^{29}\text{Si}$  HMBC NMR spectrum of **3** (in  $\text{C}_6\text{D}_6$ , 298 K).

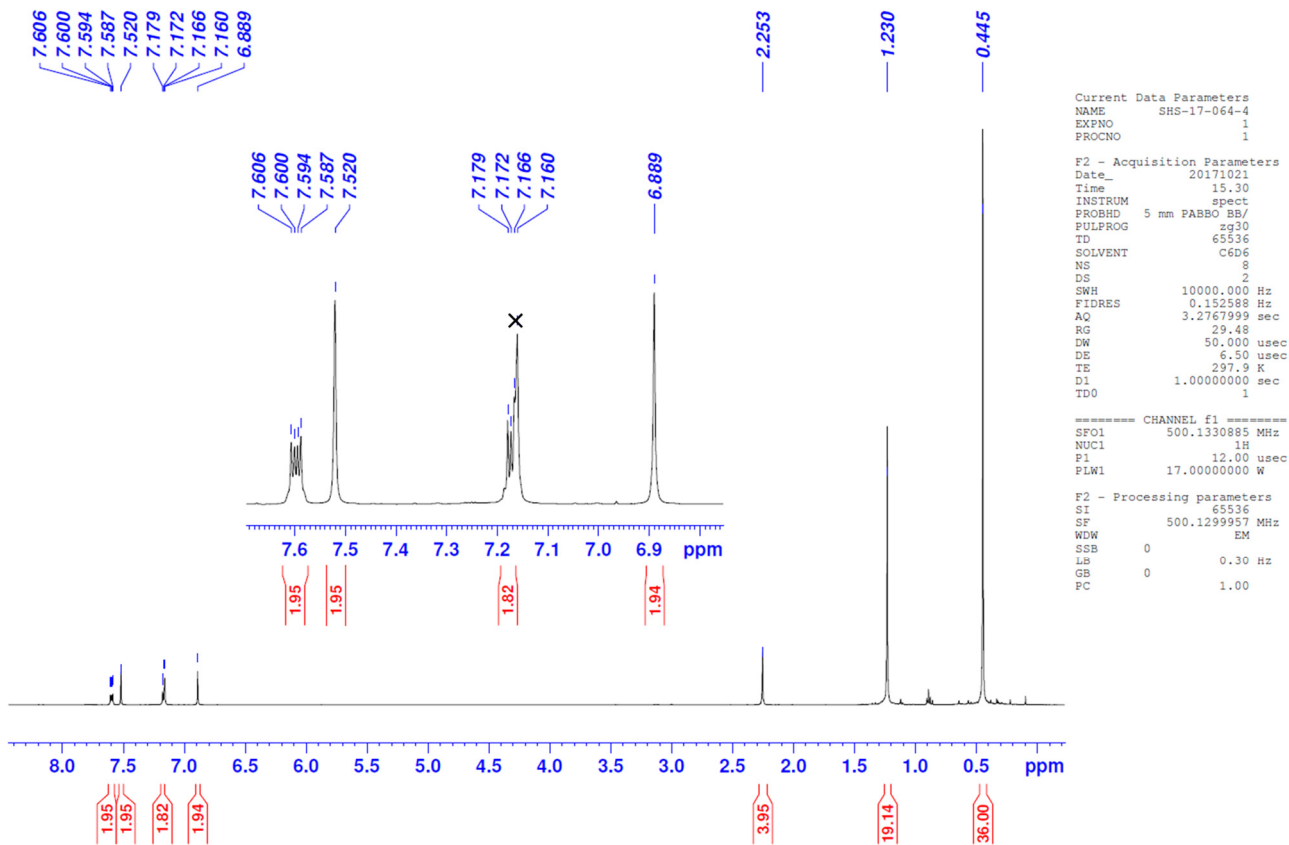

Fig. S5  $^1\text{H}$  NMR spectrum of **4** (in  $\text{C}_6\text{D}_6$ , 298 K). ( $\times = \text{C}_6\text{D}_5\text{H}$ ).

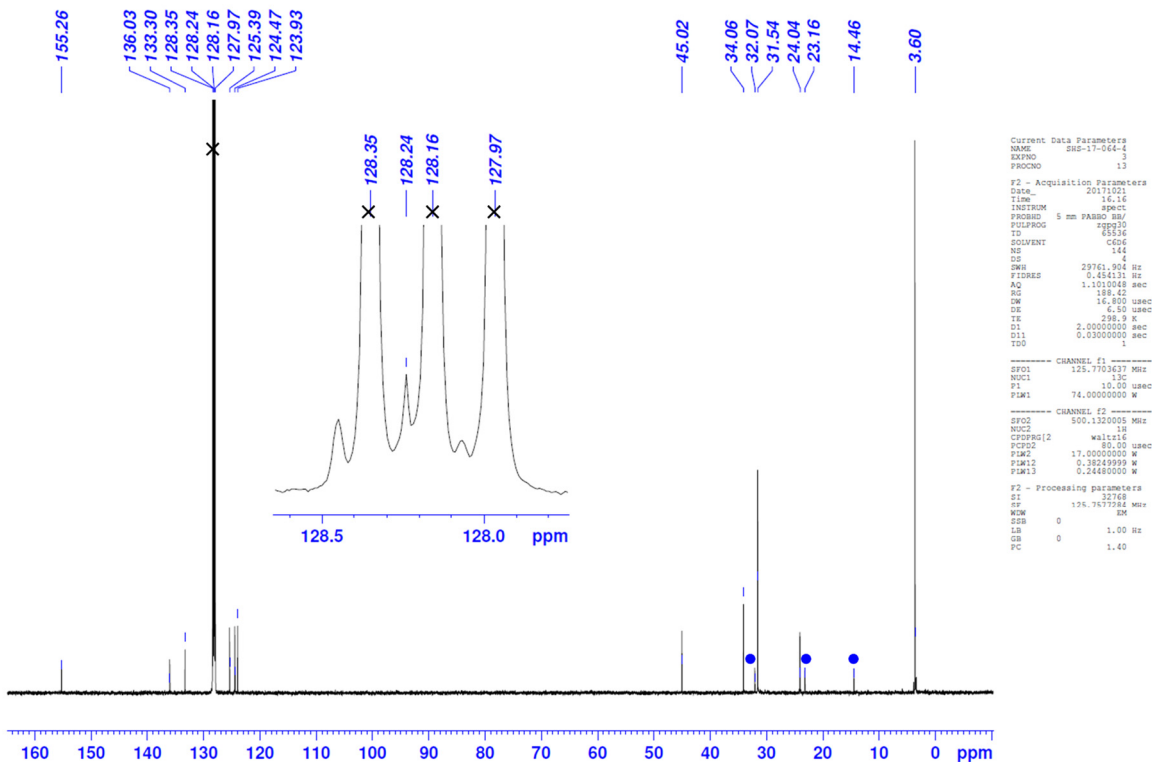

Fig. S6  $^{13}\text{C}\{^1\text{H}\}$  NMR spectrum of **4** (in  $\text{C}_6\text{D}_6$ , 299 K). ( $\times = \text{C}_6\text{D}_6$ ,  $\bullet = \text{hexane}$ ).

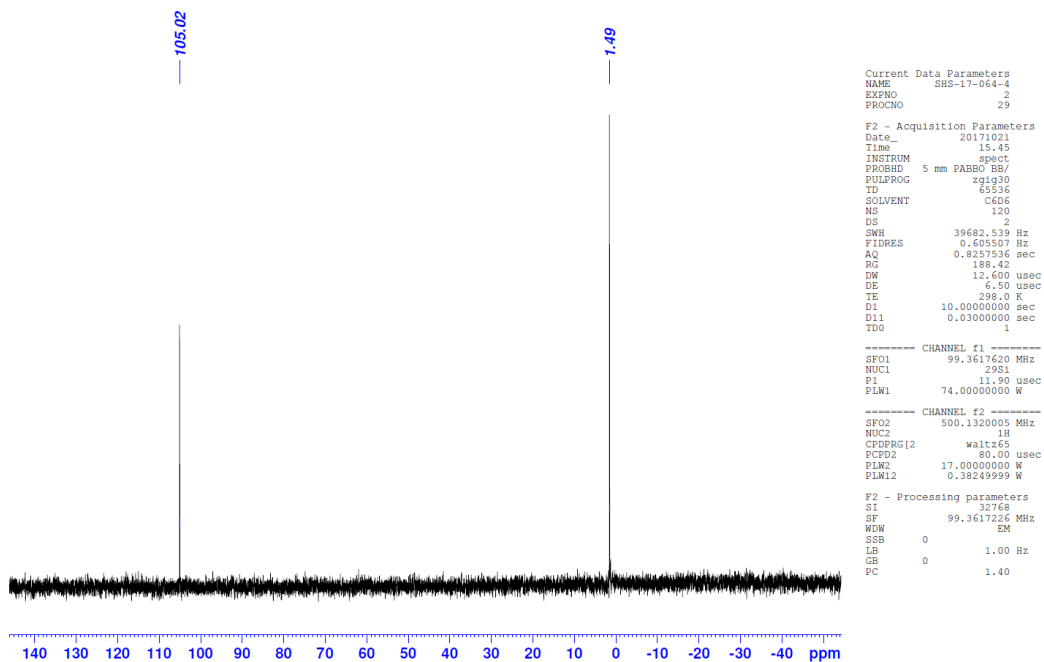

Fig. S7  $^{29}\text{Si}\{^1\text{H}\}$  NMR spectrum of **4** (in  $\text{C}_6\text{D}_6$ , 298 K).

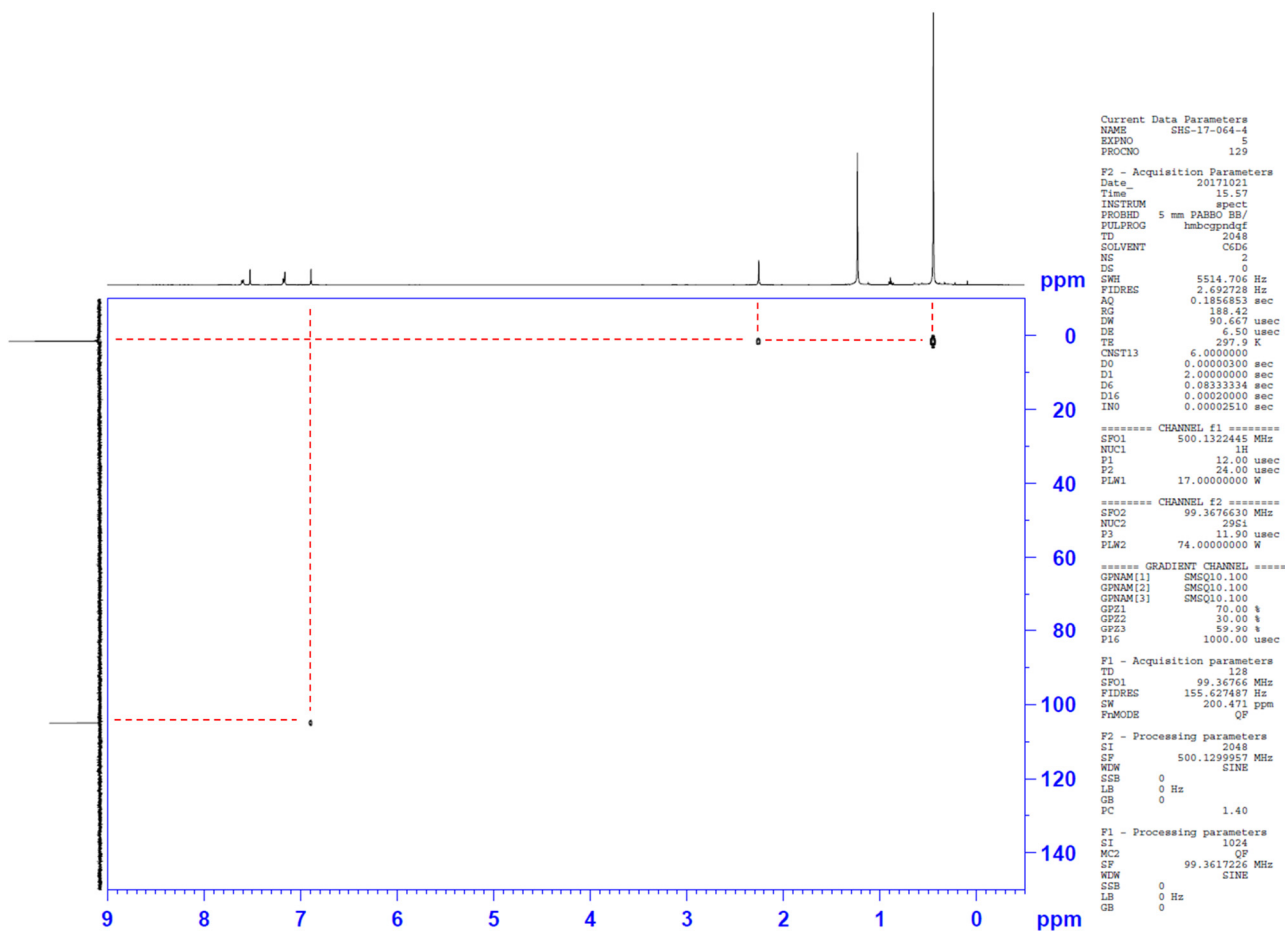

Fig. S8  $^1\text{H}$ - $^{29}\text{Si}$  HMBC NMR spectrum of **4** (in  $\text{C}_6\text{D}_6$ , 298 K).

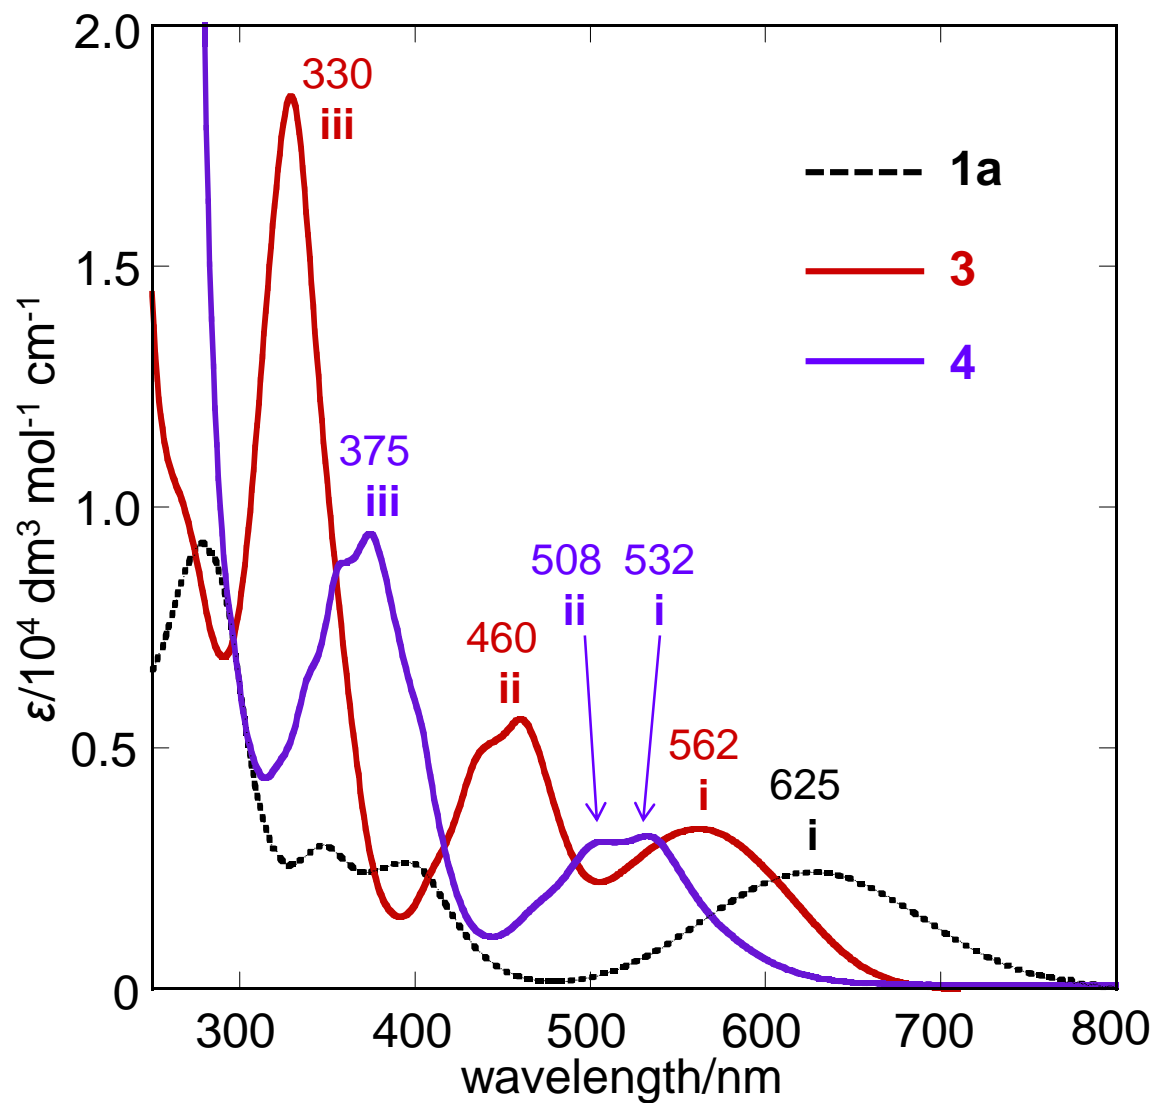

**Fig. S9** UV-vis absorption spectra of **1a**<sup>S4</sup>, **3**, and **4** in hexane solution at room temperature. The marks **i**, **ii**, and **iii** in the figure indicate band-i, band-ii, and band-iii, respectively.



### 3. Single Crystal X-ray Diffraction Analysis

Single crystals suitable for X-ray diffraction study were obtained by recrystallization from toluene at  $-35\text{ }^{\circ}\text{C}$  for **3** and **4**. The single crystals for data collection coated by Apiezon® grease was mounted on a glass fiber and then transferred to the cold nitrogen gas stream of the diffractometer. X-ray diffraction data were collected on a Bruker AXS APEX II CCD diffractometer with graphite monochromated Mo-K $\alpha$  radiation. An empirical absorption correction based on the multiple measurement of equivalent reflections was applied using the program SADABS<sup>S5</sup> and the structures were solved by direct methods and refined by full-matrix least squares against  $F^2$  using all data (SHELEX-2014).<sup>S6</sup> Molecular structures were analyzed by Yadokari-XG<sup>S7</sup> software.

Crystal data for **3** (CCDC-1958060) (100 K): 0.30 mm  $\times$  0.20 mm  $\times$  0.02 mm; C<sub>34</sub>H<sub>64</sub>Si<sub>6</sub>; Formula weight 641.39; monoclinic; space group  $C2/c$ ;  $a = 13.861(2)\text{ \AA}$ ,  $b = 13.3307(19)\text{ \AA}$ ,  $c = 20.858(3)\text{ \AA}$ ,  $\beta = 98.406(3)^{\circ}$ ,  $V = 3812.6(10)\text{ \AA}^3$ ,  $Z = 4$ ,  $D_{\text{calcd}} = 1.117\text{ Mg m}^{-3}$ , 15835 reflections measured, 3547 unique ( $R_{\text{int}} = 0.0461$ ), which were used in all calculations;  $R1 = 0.0370$  ( $I > 2\sigma(I)$ ),  $wR2 = 0.1026$  (all data), GOF = 1.098, max/min residual electron densities 0.583/ $-0.258\text{ e/\AA}^3$ .

Crystal data for **4** (CCDC-1958061) (100 K): 0.20 mm  $\times$  0.10 mm  $\times$  0.05 mm; C<sub>45</sub>H<sub>74</sub>Si<sub>6</sub>; Formula weight 783.58; triclinic; space group  $P-1$ ;  $a = 12.9500(6)\text{ \AA}$ ,  $b = 13.4087(7)\text{ \AA}$ ,  $c = 14.2041(7)\text{ \AA}$ ,  $\alpha = 92.261(1)^{\circ}$ ,  $\beta = 101.164(1)^{\circ}$ ,  $\gamma = 100.116(1)^{\circ}$ ,  $V = 2375.2(2)\text{ \AA}^3$ ,  $Z = 2$ ,  $D_{\text{calcd}} = 1.096\text{ Mg m}^{-3}$ , 35324 reflections measured, 10901 unique ( $R_{\text{int}} = 0.0256$ ), which were used in all calculations;  $R1 = 0.0331$  ( $I > 2\sigma(I)$ ),  $wR2 = 0.0891$  (all data), GOF = 1.041, max/min residual electron densities 0.467/ $-0.230\text{ e/\AA}^3$ .

**Table S1.** Structural Parameters around Disilene Moiety in **1a**, **3**, and **4**

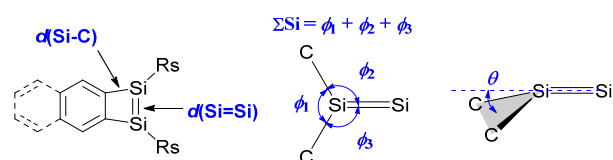

| Compound               | $d(\text{Si}=\text{Si})^a/\text{\AA}$ | $d(\text{Si}-\text{C})^b/\text{\AA}$ | $\Sigma\text{Si}^c/^{\circ}$ | $\theta^d/^{\circ}$ |
|------------------------|---------------------------------------|--------------------------------------|------------------------------|---------------------|
| <b>1a</b> <sup>e</sup> | 2.2386(8)                             | 1.902(2)                             | 340.47(7)                    | 35.3                |
|                        |                                       | 1.915(2)                             | 335.68(7)                    | 40.4                |
| <b>3</b>               | 2.1920(9)                             | 1.8921(16)                           | 349.17(6)                    | 29.3                |
| <b>4</b>               | 2.1886(5)                             | 1.8758(13)                           | 353.37(5)                    | 19.8                |
|                        |                                       | 1.8754(13)                           | 351.23(5)                    | 24.0                |

<sup>a</sup>the lengths of the Si=Si bonds, <sup>b</sup>the lengths of the Si-C bonds connecting the disilene with the benzene rings, <sup>c</sup>angle sums around unsaturated silicon atoms, <sup>d</sup>trans-bent angles of the disilene moieties, <sup>e</sup>ref S4

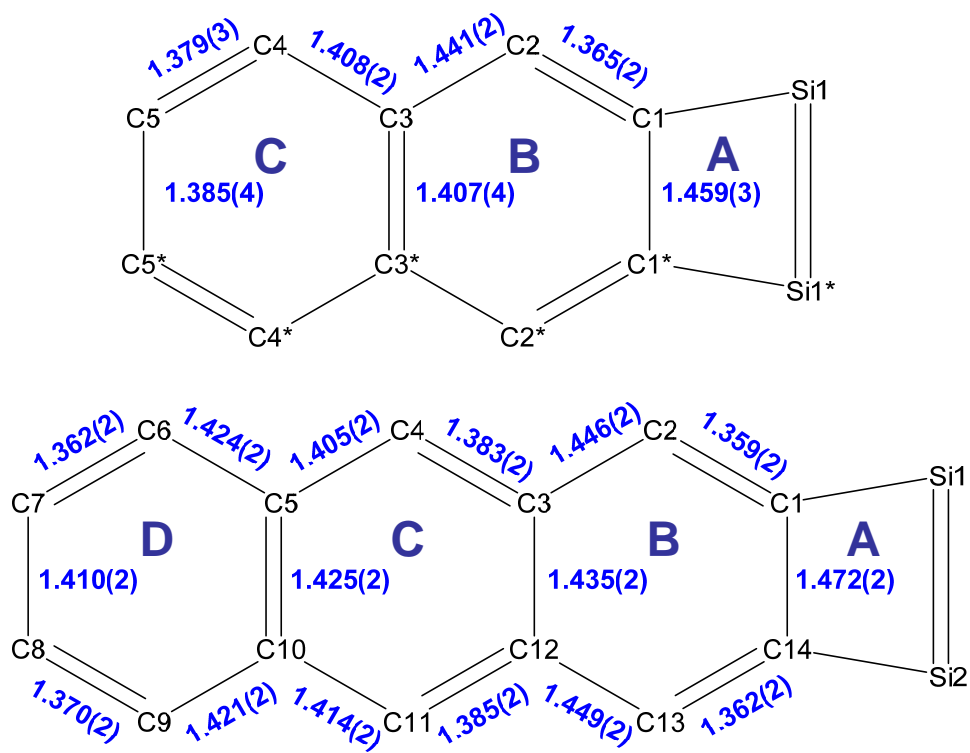

**Fig. S10** C(sp<sup>2</sup>)-C(sp<sup>2</sup>) bond lengths (Å) of **3** and **4**.

#### 4. Theoretical Calculations

All theoretical calculations were performed using Gaussian 09<sup>S8</sup> and GRRM 14<sup>S9</sup> programs. Geometry optimization and frequency analysis were carried out at the B3PW91+D3/6-31G(d) level of theory for all compounds. Atomic coordinates of the optimized structures were listed in Tables S2-S17. No imaginary frequencies were found in the equilibrium structures of all compounds. Forty excited states of **1<sub>opt</sub>** and **3<sub>opt</sub>** and sixty excited states of **4<sub>opt</sub>** calculated at the TD-HCCT407/6-31+G(d,p) level of theory was summarized in Tables S18-S20. NRT analysis of **3<sub>m</sub>** and **4<sub>m</sub>** were carried out at the M06-2X/6-31G(d) level of theory.

**Table S2.** Atomic Coordinates of **1a<sub>opt</sub>**

| Atomic Type | Coordinates (Angstroms) |                 |                |
|-------------|-------------------------|-----------------|----------------|
|             | X                       | Y               | Z              |
| Si          | 2.577081628814          | 2.398203581275  | 4.517214983814 |
| Si          | 3.394933912486          | 0.403222326388  | 4.148845981485 |
| C           | 4.089656593706          | 2.370909409673  | 5.700637095516 |
| C           | 4.726557743056          | 3.215067112977  | 6.588276703028 |
| H           | 4.446880503144          | 4.264430759105  | 6.665213239046 |
| C           | 5.751630528491          | 2.712851757316  | 7.422239737688 |
| H           | 6.249105055710          | 3.379312487591  | 8.120997353543 |
| C           | 6.116382040249          | 1.384906716297  | 7.353287938545 |
| H           | 6.907208071765          | 1.003496913834  | 7.992782178079 |
| C           | 5.466808658616          | 0.511975599155  | 6.450681765630 |
| H           | 5.776492911983          | -0.530785031266 | 6.406608896953 |
| C           | 4.461262379494          | 0.992991561101  | 5.635459872647 |
| C           | 1.998884402578          | 3.987952406538  | 3.680591829521 |
| C           | 2.027336049506          | 5.160946590546  | 4.728433865084 |
| H           | 3.034320334377          | 5.172880730540  | 5.165975180290 |
| H           | 1.945757591842          | 6.115123503684  | 4.181792925015 |
| C           | 1.047260107628          | 5.273546371125  | 5.929801701608 |
| C           | -0.319954386070         | 5.823196821567  | 5.510864457965 |
| H           | -0.835021308232         | 5.174974901037  | 4.799905291771 |
| H           | -0.216495589561         | 6.812329355216  | 5.049069611126 |
| H           | -0.967422966374         | 5.928844618629  | 6.388996886818 |
| C           | 1.676620300237          | 6.292205041557  | 6.894075725643 |
| H           | 1.001289855100          | 6.502181066628  | 7.730742696491 |
| H           | 1.886836063461          | 7.239627558264  | 6.383869409349 |
| H           | 2.618084265487          | 5.912573962594  | 7.307644281061 |
| C           | 0.870622435674          | 3.952323798475  | 6.682331502782 |
| H           | 1.837898421269          | 3.541926279687  | 7.000918796559 |
| H           | 0.354259880774          | 3.196480124930  | 6.080582006980 |
| H           | 0.271666911334          | 4.114304937048  | 7.586532954845 |
| Si          | 3.377716406698          | 4.500790223859  | 2.416088550823 |
| C           | 4.853548178613          | 5.219869746851  | 3.348237656713 |
| H           | 5.670808960315          | 5.372794384262  | 2.633811829456 |
| H           | 5.216516189143          | 4.536344450447  | 4.123982471817 |
| H           | 4.637002072422          | 6.186286106367  | 3.813259152698 |
| C           | 4.097761142051          | 3.146283967682  | 1.318657676205 |
| H           | 3.357996546364          | 2.570331321676  | 0.758946772325 |
| H           | 4.706983471416          | 2.447548596358  | 1.899930839062 |
| H           | 4.753087707355          | 3.640472012248  | 0.589944311317 |
| Si          | 0.359290254176          | 3.665769784405  | 2.751377159903 |
| C           | 2.716419453847          | 5.858146975158  | 1.273721207956 |
| H           | 3.562909502580          | 6.306448656750  | 0.740434153121 |
| H           | 2.209002854964          | 6.660441512846  | 1.818973834172 |
| H           | 2.022307957564          | 5.471798670680  | 0.520612135133 |
| C           | -0.893320089411         | 2.649232625658  | 3.748261775560 |
| H           | -1.646337627390         | 2.252783130275  | 3.056194632398 |
| H           | -1.422347330475         | 3.214431301545  | 4.520098177929 |
| H           | -0.414862468949         | 1.793410988404  | 4.238522189682 |
| C           | 0.712570601780          | 2.608244720092  | 1.223006659270 |
| H           | -0.235816378600         | 2.241095851743  | 0.813885930776 |
| H           | 1.326846679765          | 1.732931236087  | 1.463120636022 |
| H           | 1.220817747948          | 3.169045662098  | 0.432001226463 |
| C           | -0.459462283318         | 5.275420190551  | 2.169975624912 |
| H           | -0.323668692491         | 5.411652448308  | 1.092574545347 |
| H           | -0.057145601301         | 6.161798906975  | 2.669027334693 |
| H           | -1.536465134112         | 5.248139811271  | 2.368897696343 |
| C           | 2.927082066142          | -1.409298350169 | 3.913468674576 |
| C           | 4.187328292531          | -2.308211077862 | 4.191519752762 |
| H           | 4.572158064489          | -2.018309108614 | 5.178155243756 |
| H           | 3.848052386070          | -3.350155573319 | 4.313785316404 |
| C           | 5.428712569239          | -2.372264630932 | 3.259312364964 |

|    |                 |                 |                 |
|----|-----------------|-----------------|-----------------|
| C  | 5.913880778219  | -0.988989123962 | 2.818380694927  |
| H  | 6.855825681279  | -1.080897526570 | 2.264613005548  |
| H  | 6.104979600996  | -0.339005307220 | 3.682503899008  |
| H  | 5.195615204351  | -0.488920709580 | 2.159476582694  |
| C  | 6.544341686346  | -3.030526294751 | 4.086936758959  |
| H  | 7.435475874908  | -3.198517505545 | 3.472173742364  |
| H  | 6.219452898659  | -4.000066733470 | 4.482565916309  |
| H  | 6.833171611713  | -2.397697221908 | 4.934066632401  |
| C  | 5.186954659869  | -3.256194215817 | 2.031867021666  |
| H  | 4.390773735192  | -2.877006037570 | 1.389098869281  |
| H  | 4.918647341085  | -4.276136525547 | 2.332006297055  |
| H  | 6.098470155275  | -3.314611472614 | 1.425821116013  |
| Si | 1.728573876297  | -1.880570207270 | 5.364185767518  |
| C  | 0.346753646407  | -0.666393249351 | 5.782190368576  |
| H  | -0.296179110024 | -1.156450632243 | 6.524495299004  |
| H  | -0.281954029252 | -0.383813300700 | 4.935605034415  |
| H  | 0.745000335891  | 0.248284046328  | 6.231265056034  |
| C  | 2.715072280213  | -2.082835640684 | 6.961294633957  |
| H  | 3.316006141327  | -1.194423439510 | 7.186272097961  |
| H  | 3.378117572699  | -2.953016205905 | 6.945042029367  |
| H  | 2.008152808939  | -2.221168355016 | 7.787643207267  |
| C  | 0.916286729262  | -3.549024788530 | 4.989510657823  |
| H  | 0.362943833224  | -3.875833221759 | 5.877646114066  |
| H  | 1.648140185210  | -4.328529353728 | 4.753194774757  |
| H  | 0.205550781743  | -3.494215250795 | 4.159059945916  |
| Si | 2.027410511534  | -1.624729273738 | 2.238955725311  |
| C  | 0.298431917963  | -0.866697620284 | 2.362530242404  |
| H  | 0.321280098410  | 0.145007524178  | 2.783387442586  |
| H  | -0.381178364944 | -1.469467129357 | 2.973608147769  |
| H  | -0.133172249852 | -0.794144194771 | 1.357429053607  |
| C  | 1.830694011730  | -3.452083133761 | 1.764585313072  |
| H  | 0.787141909054  | -3.767717721797 | 1.862068911722  |
| H  | 2.437537192605  | -4.118846019495 | 2.384357280996  |
| H  | 2.129015285999  | -3.611451781372 | 0.722653150303  |
| C  | 2.851520378799  | -0.689180599214 | 0.809598110143  |
| H  | 2.125226839811  | -0.593650319132 | -0.006829867234 |
| H  | 3.740847199859  | -1.177040427713 | 0.401869224953  |
| H  | 3.143054793243  | 0.324083167139  | 1.109411340042  |

-----  
 Enthalpie(0K) = -2915.912324877938

**Table S3.** Atomic Coordinates of  $\mathbf{3}_{opt}$

| Atomic Type | Coordinates (Angstroms) |                 |                |
|-------------|-------------------------|-----------------|----------------|
|             | X                       | Y               | Z              |
| Si          | 2.642303353902          | 2.419448460184  | 4.496808571204 |
| Si          | 3.374959997404          | 0.388518975059  | 4.222375088001 |
| C           | 4.117988386948          | 2.393266404352  | 5.693229789530 |
| C           | 4.761264508358          | 3.236507353855  | 6.546655666076 |
| H           | 4.517381556423          | 4.297706507227  | 6.594428536596 |
| C           | 5.790718238722          | 2.746437569352  | 7.429009797574 |
| C           | 6.127782439134          | 1.367670714848  | 7.401136486242 |
| C           | 5.429755176987          | 0.491486136505  | 6.492937709732 |
| H           | 5.714379709095          | -0.560592964780 | 6.486825262502 |
| C           | 4.456157799892          | 0.974038483627  | 5.672226111146 |
| C           | 2.015688394764          | 3.990610514622  | 3.670650128878 |
| C           | 2.037920777788          | 5.164631862521  | 4.718429184858 |
| H           | 3.047944653644          | 5.189601566070  | 5.147995469273 |
| H           | 1.941095920362          | 6.116392056708  | 4.170215071397 |
| C           | 1.065309823843          | 5.267730473371  | 5.926828323359 |
| C           | -0.309759065770         | 5.804878382241  | 5.517258176350 |
| H           | -0.825839710522         | 5.150162950732  | 4.812934371684 |
| H           | -0.218717145593         | 6.793417077506  | 5.051496537622 |
| H           | -0.950527340281         | 5.907917526231  | 6.400556048402 |
| C           | 1.692572819162          | 6.292734431155  | 6.885835232860 |
| H           | 1.021401315400          | 6.496900515461  | 7.727218182728 |
| H           | 1.890612766178          | 7.241936161848  | 6.373989514386 |
| H           | 2.639975477016          | 5.920931066502  | 7.292861028894 |
| C           | 0.906487523389          | 3.945929841011  | 6.682203434778 |
| H           | 1.878881404374          | 3.548970757392  | 7.000289235180 |
| H           | 0.400396510547          | 3.181917140604  | 6.082180094788 |
| H           | 0.304866139161          | 4.102676145437  | 7.585488034638 |
| Si          | 3.376379414350          | 4.517637801209  | 2.390790715590 |
| C           | 4.851013556712          | 5.254812685488  | 3.309413000879 |
| H           | 5.661339359103          | 5.416252746521  | 2.589085090625 |
| H           | 5.227163954042          | 4.575732760865  | 4.082940470535 |
| H           | 4.627038030906          | 6.219079921684  | 3.775384975746 |
| C           | 4.098015292957          | 3.156195417304  | 1.303379309296 |
| H           | 3.360347874886          | 2.589478082641  | 0.731530112113 |
| H           | 4.690363976530          | 2.450346901609  | 1.894145624833 |
| H           | 4.771447671896          | 3.641210374598  | 0.585316230060 |

|    |                 |                 |                |
|----|-----------------|-----------------|----------------|
| Si | 0.370709951269  | 3.645369535974  | 2.758906407515 |
| C  | 2.688425347648  | 5.859813009442  | 1.247599336901 |
| H  | 3.522062664500  | 6.301427751764  | 0.689237913296 |
| H  | 2.194500364355  | 6.668546266887  | 1.795870646277 |
| H  | 1.975574298814  | 5.464796449321  | 0.517101822805 |
| C  | -0.854180459078 | 2.615133373655  | 3.775145673538 |
| H  | -1.599414117133 | 2.186907145355  | 3.093660398369 |
| H  | -1.393970180699 | 3.181955961799  | 4.538303310167 |
| H  | -0.353173686561 | 1.781091190412  | 4.280460691133 |
| C  | 0.719992247117  | 2.594269175248  | 1.225562944170 |
| H  | -0.229216131088 | 2.220361931182  | 0.824432692645 |
| H  | 1.343948556503  | 1.723515806621  | 1.456193081418 |
| H  | 1.215474467796  | 3.161976820128  | 0.431422199639 |
| C  | -0.469170390066 | 5.246963825151  | 2.186743371930 |
| H  | -0.357279710609 | 5.377749379063  | 1.105868459669 |
| H  | -0.059600217499 | 6.137561342592  | 2.672214463380 |
| H  | -1.541396617071 | 5.216553312057  | 2.409108247852 |
| C  | 2.916643940107  | -1.412903345340 | 3.930376181571 |
| C  | 4.177173261749  | -2.314618461868 | 4.201135640876 |
| H  | 4.556191006304  | -2.040007885868 | 5.194392630815 |
| H  | 3.836913182494  | -3.358075361123 | 4.305658607586 |
| C  | 5.423669832536  | -2.363521014024 | 3.274719396649 |
| C  | 5.908550185442  | -0.973786117456 | 2.854601129808 |
| H  | 6.850392633970  | -1.057787253410 | 2.299549072132 |
| H  | 6.097464294552  | -0.336314693368 | 3.727831124453 |
| H  | 5.189978522446  | -0.465011575203 | 2.202775709168 |
| C  | 6.535729923103  | -3.030196806011 | 4.100517765556 |
| H  | 7.430819062891  | -3.188041655566 | 3.488897139634 |
| H  | 6.210942968968  | -4.005572534871 | 4.481709321057 |
| H  | 6.818051110150  | -2.407159831720 | 4.957005803667 |
| C  | 5.190666805947  | -3.231810010741 | 2.034499032909 |
| H  | 4.401121071655  | -2.842776590776 | 1.389358302315 |
| H  | 4.918176424632  | -4.255107099522 | 2.319083837230 |
| H  | 6.107254911168  | -3.284032030579 | 1.435675461625 |
| Si | 1.706168277232  | -1.909257953277 | 5.364418680785 |
| C  | 0.331949776605  | -0.688275941655 | 5.787029200034 |
| H  | -0.295927759366 | -1.163864483556 | 6.551154050506 |
| H  | -0.314394295663 | -0.422031327541 | 4.948337861507 |
| H  | 0.738647351979  | 0.234271786091  | 6.212740445627 |
| C  | 2.684069531690  | -2.134355491922 | 6.962974134318 |
| H  | 3.284677083091  | -1.249223941963 | 7.201644589166 |
| H  | 3.346495513728  | -3.004778882372 | 6.937988565363 |
| C  | 1.973949205825  | -2.282832861030 | 7.784709189283 |
| H  | 0.892329034257  | -3.568566417745 | 4.959555528147 |
| H  | 0.330056047575  | -3.904180033994 | 5.838762867598 |
| H  | 1.623955222843  | -4.347570650478 | 4.720889300737 |
| H  | 0.189407771757  | -3.501470542642 | 4.123609202348 |
| Si | 2.029451193620  | -1.599599951343 | 2.245227071778 |
| C  | 0.296471522828  | -0.850871213198 | 2.367509086613 |
| H  | 0.308890578520  | 0.155603534973  | 2.800715670961 |
| H  | -0.384341125804 | -1.465460518894 | 2.965313534785 |
| C  | -0.127953923469 | -0.768777346938 | 1.360006573540 |
| H  | 1.840448874240  | -3.419907560084 | 1.743130778439 |
| H  | 0.795861370502  | -3.737088549063 | 1.823080707824 |
| H  | 2.439954408564  | -4.094336927324 | 2.361747453379 |
| H  | 2.152429830356  | -3.565175585208 | 0.703210452243 |
| C  | 2.868706151887  | -0.637796666817 | 0.842658678786 |
| H  | 2.142372871931  | -0.494343482091 | 0.033366327058 |
| H  | 3.742574625490  | -1.136461881651 | 0.415055563648 |
| H  | 3.190562040284  | 0.356203491023  | 1.174360311026 |
| C  | 6.471242440693  | 3.598998155083  | 8.319118947157 |
| C  | 7.456290897962  | 3.112645277636  | 9.155724051208 |
| H  | 6.208339049047  | 4.654164387415  | 8.335731394853 |
| H  | 7.973334311692  | 3.783349783638  | 9.835260823544 |
| C  | 7.135948969548  | 0.894131056396  | 8.263103274393 |
| C  | 7.790881857455  | 1.748558408208  | 9.127739495017 |
| H  | 7.390612896523  | -0.162911151840 | 8.238821877274 |
| H  | 8.563480028543  | 1.366928951390  | 9.788237274931 |

Enthalpie(0K) = -3069.454495122173

**Table S4.** Atomic Coordinates of  $4_{opt}$

| Atomic Type | Coordinates (Angstroms) |                |                |
|-------------|-------------------------|----------------|----------------|
|             | X                       | Y              | Z              |
| Si          | 2.674740777974          | 2.428643411118 | 4.488507928680 |
| Si          | 3.368755207821          | 0.381292135601 | 4.255150464174 |
| C           | 4.130892146007          | 2.400600728226 | 5.691095082058 |
| C           | 4.775807532058          | 3.244531623259 | 6.534976824362 |
| H           | 4.542236690611          | 4.308302731782 | 6.571665714518 |
| C           | 5.804367554815          | 2.757662291243 | 7.431915274855 |
| C           | 6.134570069195          | 1.357069341673 | 7.416530584340 |

|    |                 |                 |                 |
|----|-----------------|-----------------|-----------------|
| C  | 5.422318047536  | 0.480772906300  | 6.507364125492  |
| H  | 5.696452266472  | -0.573957566536 | 6.511333041555  |
| C  | 4.457786129090  | 0.965442095285  | 5.684911610699  |
| C  | 2.025652914349  | 3.992622002976  | 3.671299948052  |
| C  | 2.045291014226  | 5.165434862378  | 4.720843745935  |
| H  | 3.056354117098  | 5.195261058734  | 5.147349824297  |
| H  | 1.942202501783  | 6.116922464729  | 4.173374745094  |
| C  | 1.075336267784  | 5.262488518214  | 5.931845065647  |
| C  | -0.302688961078 | 5.795263656107  | 5.526417063973  |
| H  | -0.818996446771 | 5.139194103167  | 4.823530873794  |
| H  | -0.216405904934 | 6.784270483870  | 5.060720518433  |
| H  | -0.941051599528 | 5.895910953288  | 6.411697044102  |
| C  | 1.701069172535  | 6.288406775162  | 6.890911762787  |
| H  | 1.031295878401  | 6.488173331086  | 7.734428304343  |
| H  | 1.893704087016  | 7.239444631591  | 6.380395207326  |
| H  | 2.650945298044  | 5.919566030517  | 7.294756959613  |
| C  | 0.923761541923  | 3.938962809511  | 6.685627659708  |
| H  | 1.897986533592  | 3.548072410843  | 7.004748890063  |
| H  | 0.424178980045  | 3.172174192117  | 6.083708495450  |
| H  | 0.318899917441  | 4.091002960328  | 7.587503478967  |
| Si | 3.378749049162  | 4.527559696343  | 2.385493791654  |
| C  | 4.851831235494  | 5.273429262665  | 3.299020373323  |
| H  | 5.658737975521  | 5.440314066024  | 2.576134433925  |
| H  | 5.234881287053  | 4.596031931956  | 4.070726746493  |
| H  | 4.623567565073  | 6.235926059637  | 3.766540805142  |
| C  | 4.102876603398  | 3.163085498949  | 1.303554332012  |
| H  | 3.366994627718  | 2.597446821213  | 0.728309172406  |
| H  | 4.690348092305  | 2.456622287687  | 1.898805714865  |
| H  | 4.782116764522  | 3.644443999649  | 0.588606073619  |
| Si | 0.378589356166  | 3.639224151842  | 2.766107694363  |
| C  | 2.678736377738  | 5.862571226433  | 1.242105421745  |
| H  | 3.505582594655  | 6.297070100565  | 0.668344434394  |
| H  | 2.196086560609  | 6.676975900722  | 1.792135055778  |
| H  | 1.953137241904  | 5.464976093710  | 0.525824620423  |
| C  | -0.835880450249 | 2.602737568600  | 3.788156942223  |
| H  | -1.578623626322 | 2.164728675411  | 3.110185204441  |
| H  | -1.378978341994 | 3.168920626254  | 4.549413958429  |
| H  | -0.327481793897 | 1.775434444642  | 4.297131288946  |
| C  | 0.727098385822  | 2.592579952378  | 1.229813266023  |
| H  | -0.222113085351 | 2.216821762948  | 0.830406170674  |
| H  | 1.354226209110  | 1.723183589277  | 1.456452306642  |
| H  | 1.218654829124  | 3.163575673194  | 0.435610097721  |
| C  | -0.469501826721 | 5.238486210762  | 2.200117001393  |
| H  | -0.372138650267 | 5.365780425213  | 1.117379867837  |
| H  | -0.053088899952 | 6.130454444965  | 2.677248880019  |
| H  | -1.538615713070 | 5.209146571488  | 2.436924202983  |
| C  | 2.196597531943  | -1.415080076602 | 3.938240903233  |
| C  | 4.177635387517  | -2.317733661934 | 4.204665950812  |
| H  | 4.555182741363  | -2.049799741252 | 5.200262400961  |
| H  | 3.837192225292  | -3.361811460617 | 4.301899327901  |
| C  | 5.425092766787  | -2.359819115602 | 3.279182124748  |
| C  | 5.908237861512  | -0.967213243487 | 2.866741617630  |
| H  | 6.848437848452  | -1.047418653973 | 2.308432617038  |
| H  | 6.098540094405  | -0.335246806177 | 3.743380442706  |
| C  | 5.187578584883  | -0.454676651140 | 2.220192572381  |
| H  | 6.537263301289  | -3.028877181381 | 4.1029344478374 |
| H  | 7.433362608345  | -3.181790801014 | 3.491581847879  |
| H  | 6.213878386406  | -4.006880731814 | 4.478579107092  |
| H  | 6.817368757086  | -2.409643494669 | 4.962867720260  |
| C  | 5.194671134551  | -3.222451067735 | 2.034507377537  |
| H  | 4.406188786148  | -2.830939092938 | 1.389555294183  |
| H  | 4.922341673300  | -4.247263031954 | 2.313763531403  |
| H  | 6.112367252071  | -3.271328535774 | 1.437163078122  |
| Si | 1.702622715232  | -1.921760010213 | 5.366816435937  |
| C  | 0.334872795223  | -0.695200333088 | 5.794075471386  |
| H  | -0.290178401104 | -1.165865646169 | 6.563483608870  |
| H  | -0.315738151820 | -0.429320016818 | 4.958525514337  |
| H  | 0.747161936875  | 0.227152597211  | 6.215307182422  |
| C  | 2.679054225669  | -2.158512266727 | 6.964159256421  |
| H  | 3.280708165698  | -1.275513161457 | 7.208221290113  |
| H  | 3.340303908914  | -3.029643666647 | 6.934252075196  |
| H  | 1.968518191319  | -2.310810811086 | 7.784801977202  |
| C  | 0.884835022296  | -3.575295202311 | 4.949469692541  |
| H  | 0.320569516118  | -3.914706340451 | 5.825938504488  |
| H  | 1.614625564118  | -4.354847098240 | 4.707079820626  |
| H  | 0.183204337076  | -3.500989575201 | 4.113156911578  |
| Si | 2.032815766992  | -1.590294236905 | 2.249790285313  |
| C  | 0.299596599642  | -0.842639630738 | 2.372915363963  |
| H  | 0.310675886841  | 0.162261893809  | 2.809596087424  |
| H  | -0.382159168245 | -1.459606587874 | 2.967168258062  |
| H  | -0.123200334968 | -0.757019505261 | 1.365002691287  |
| C  | 1.845279426128  | -3.407754857109 | 1.737997238784  |
| H  | 0.800574593934  | -3.725496131533 | 1.814062124667  |
| H  | 2.443680970033  | -4.085134414091 | 2.354443961276  |

|   |                 |                 |                 |
|---|-----------------|-----------------|-----------------|
| H | 2.159659918737  | -3.547543063085 | 0.698069594908  |
| C | 2.876607571355  | -0.620515422289 | 0.855702558668  |
| H | 2.151401999388  | -0.466771339259 | 0.047282365827  |
| H | 3.748102356225  | -1.120116530805 | 0.424464074750  |
| H | 3.203750040740  | 0.369098998133  | 1.195149965031  |
| C | 6.474879158290  | 3.602150108243  | 8.299174084911  |
| C | 7.476340177497  | 3.129215908358  | 9.169938600760  |
| H | 6.225237303407  | 4.661734899431  | 8.310529527765  |
| C | 7.118668676663  | 0.885494771602  | 8.268597583239  |
| C | 7.805445597594  | 1.739093256630  | 9.154583134413  |
| H | 7.369713900164  | -0.173788968394 | 8.258888906090  |
| C | 8.816021130765  | 1.263929888813  | 10.037526423439 |
| C | 9.465447661911  | 2.118491423583  | 10.886681071870 |
| H | 9.061632254858  | 0.204906170785  | 10.023371162191 |
| H | 10.233542134823 | 1.743195119125  | 11.555945632716 |
| C | 8.171884665564  | 3.989991662820  | 10.064797312699 |
| C | 9.139409757561  | 3.500850125513  | 10.900149740817 |
| H | 7.917507524116  | 5.047003500949  | 10.070716094867 |
| H | 9.663159371972  | 4.167628952815  | 11.578359835100 |

-----  
 Enthalpie(0K) = -3222.986943921351

**Table S5.** Atomic Coordinates of benzene

| Atomic Type | Coordinates (Angstroms) |                 |                 |
|-------------|-------------------------|-----------------|-----------------|
|             | X                       | Y               | Z               |
| H           | -1.029472817182         | -1.598678399010 | -0.000150657585 |
| C           | -1.578860694338         | -0.660364138128 | 0.000061607833  |
| C           | -2.988293054105         | 1.746485332086  | 0.000603950563  |
| C           | -1.593705530174         | 1.755021069016  | 0.000418372667  |
| C           | -0.888959867035         | 0.551610978413  | 0.000147512036  |
| H           | -3.537680568606         | 2.684799813617  | 0.000816215256  |
| H           | -1.055844659182         | 2.699990804081  | 0.000485861535  |
| H           | 0.198333364556          | 0.558299517431  | 0.00002992887   |
| C           | -3.678196246057         | 0.534509348795  | 0.000518060853  |
| H           | -4.765488489871         | 0.527820965108  | 0.000662621088  |
| C           | -2.973450144277         | -0.668901463525 | 0.000247198203  |
| H           | -3.511310643732         | -1.613870317886 | 0.000179734665  |

-----  
 Sum of electronic and zero-point Energies= -232.058059430870

**Table S6.** Atomic Coordinates of naphthalene

| Atomic Type | Coordinates (Angstroms) |                 |                 |
|-------------|-------------------------|-----------------|-----------------|
|             | X                       | Y               | Z               |
| C           | 2.426270554377          | 0.708242231719  | -0.000003448626 |
| C           | 1.242218223902          | 1.399222501531  | 0.000002640974  |
| C           | 0.000009750358          | 0.711497039336  | 0.000004887939  |
| C           | -0.000009724484         | -0.711497761243 | 0.000003638599  |
| C           | 1.242235847754          | -1.399197671243 | 0.000001525134  |
| C           | 2.426171059076          | -0.708182516908 | -0.000003385671 |
| H           | -1.236476979325         | 2.486309233056  | -0.000002057922 |
| H           | 3.370576801738          | 1.243874422327  | -0.000010467617 |
| H           | 1.235800988609          | 2.486287591005  | 0.000002604157  |
| C           | -1.242235618976         | 1.399197591188  | 0.000001503378  |
| C           | -1.242218592536         | -1.399222733849 | 0.000001602585  |
| H           | 1.236478726405          | -2.486309435186 | 0.000003215465  |
| H           | 3.370206667817          | -1.244309245342 | -0.000009809712 |
| C           | -2.426270622763         | -0.708241827225 | -0.000002506417 |
| C           | -2.426170903291         | 0.708183009033  | -0.000003587017 |
| H           | -1.235802614184         | -2.486287715480 | 0.000002239856  |
| H           | -3.370577124902         | -1.243873655598 | -0.000008002801 |
| H           | -3.370206149642         | 1.244310444317  | -0.000011904477 |

-----  
 Sum of electronic and zero-point Energies= -385.569753475335

**Table S7.** Atomic Coordinates of anthracene

| Atomic Type | Coordinates (Angstroms) |                 |                 |
|-------------|-------------------------|-----------------|-----------------|
|             | X                       | Y               | Z               |
| C           | 3.649011786935          | -0.713970902142 | -0.000080528230 |
| C           | 2.473963940641          | -1.404757482546 | -0.000005581666 |
| C           | 1.218557583243          | -0.718122119409 | 0.000042878956  |
| C           | 1.218723753745          | 0.717891527544  | 0.000010835157  |

|                                            |                 |                 |                   |
|--------------------------------------------|-----------------|-----------------|-------------------|
| C                                          | 2.474072773283  | 1.404635871528  | 0.000003484110    |
| C                                          | 3.649043013462  | 0.713874401784  | -0.000053345118   |
| C                                          | -0.000189002726 | -1.399667090414 | 0.000099394594    |
| C                                          | 0.000188974271  | 1.399667418330  | 0.000024465182    |
| C                                          | -1.218557631269 | 0.718122319525  | 0.000060267478    |
| C                                          | -1.218723719691 | -0.717891309915 | 0.000087837841    |
| C                                          | -2.474072541724 | -1.404635916854 | -0.000017545807   |
| H                                          | -2.468368040179 | -2.491618596897 | -0.000106976759   |
| C                                          | -3.649042813991 | -0.713874731109 | -0.000092405409   |
| C                                          | -3.649011792769 | 0.713970591298  | -0.000048965743   |
| C                                          | -2.473964296220 | 1.404757461084  | 0.000014427458    |
| H                                          | -0.000645743636 | -2.487940238078 | 0.000076551261    |
| H                                          | 4.595508016532  | -1.245599996379 | -0.000150154135   |
| H                                          | 2.467751280605  | -2.491681239491 | 0.000010866932    |
| H                                          | 2.468368723079  | 2.491618509048  | 0.000055583491    |
| H                                          | 4.595293076411  | 1.245978119266  | -0.000086422543   |
| H                                          | 0.000645447252  | 2.487940610924  | 0.000028425218    |
| H                                          | -4.595292891842 | -1.245978509401 | -0.000239257480   |
| H                                          | -4.595507995683 | 1.245599647552  | -0.000122276681   |
| H                                          | -2.467752196259 | 2.491681232606  | -0.00004751842    |
| Sum of electronic and zero-point Energies= |                 |                 | -539.097967825624 |

**Table S8.** Atomic Coordinates of S1

| Atomic Type                                | Coordinates (Angstroms) |                 |                   |
|--------------------------------------------|-------------------------|-----------------|-------------------|
|                                            | X                       | Y               | Z                 |
| C                                          | -1.713027549112         | 0.707044536937  | 0.001920992065    |
| C                                          | -0.565845032165         | 1.442715029638  | 0.001750350421    |
| C                                          | 0.664411620711          | 0.716107073233  | 0.001373285907    |
| C                                          | 0.664044537615          | -0.715902734896 | 0.001805933917    |
| C                                          | -0.566057599871         | -1.442477450308 | 0.001663674854    |
| C                                          | -1.713065427166         | -0.706922835112 | 0.001391246815    |
| H                                          | 1.906111550864          | 2.482088020382  | -0.000360236919   |
| H                                          | -0.546353471326         | 2.529761863057  | 0.002148736245    |
| C                                          | 1.910885335293          | 1.394891834565  | -0.000498043635   |
| C                                          | 1.910528980305          | -1.395043847252 | 0.000860466858    |
| H                                          | -0.546458207643         | -2.529552277396 | 0.000418975020    |
| C                                          | 3.097371282944          | -0.707231326895 | -0.001593686887   |
| C                                          | 3.097581906880          | 0.706921382556  | -0.002300490328   |
| H                                          | 1.905567260095          | -2.482234521362 | 0.000439287449    |
| H                                          | 4.039627518506          | -1.246411095076 | -0.002951773652   |
| H                                          | 4.039966782437          | 1.245948200837  | -0.003594686752   |
| C                                          | -3.229754411684         | 0.785997603552  | -0.001300653389   |
| H                                          | -3.676533800816         | 1.240209171120  | 0.887443625864    |
| H                                          | -3.671431058158         | 1.242000781425  | -0.891660936423   |
| C                                          | -3.229732655026         | -0.786027446597 | -0.003347307070   |
| H                                          | -3.670183123349         | -1.239582345407 | -0.895603848801   |
| H                                          | -3.677906524487         | -1.243082939110 | 0.883172415841    |
| Sum of electronic and zero-point Energies= |                         |                 | -462.885600954160 |

**Table S9.** Atomic Coordinates of S2

| Atomic Type | Coordinates (Angstroms) |                 |                 |
|-------------|-------------------------|-----------------|-----------------|
|             | X                       | Y               | Z               |
| C           | -0.263794955743         | -0.717925937391 | -0.000389272720 |
| C           | 0.926285345714          | -1.407281721438 | -0.005838548679 |
| C           | 2.164231733650          | -0.711014363866 | -0.003927111020 |
| C           | 2.166092214445          | 0.715193235048  | 0.004912939170  |
| C           | 0.928452277018          | 1.413305811317  | 0.007729218101  |
| C           | -0.262887304124         | 0.725160480387  | 0.004248492371  |
| H           | 3.400161135342          | -2.485277625826 | -0.017172478338 |
| H           | 0.949391427940          | -2.496494160684 | -0.011182407815 |
| C           | 3.407981558805          | -1.398199620212 | -0.009713857592 |
| C           | 3.411883528078          | 1.398834207084  | 0.009354146838  |
| H           | 0.952513444594          | 2.502465541746  | 0.011879166062  |
| C           | 4.595012330476          | 0.707280997406  | 0.004097482618  |
| C           | 4.592959153773          | -0.710021326377 | -0.006103454225 |
| H           | 3.407452499055          | 2.485984442750  | 0.017032276741  |
| H           | 5.539803663001          | 1.242240822166  | 0.007772230768  |
| H           | 5.536233444037          | -1.247526904133 | -0.010681312718 |
| Si          | -2.108410508718         | -1.172677077984 | 0.004700102549  |
| Si          | -2.109963754068         | 1.173713574478  | -0.003088761576 |
| C           | -2.660060167041         | -2.105508206841 | 1.550143693991  |
| H           | -3.749746540384         | -2.206625085345 | 1.578031578716  |
| H           | -2.229180752509         | -3.112476057706 | 1.568594836637  |



|                                            |                 |                 |                    |
|--------------------------------------------|-----------------|-----------------|--------------------|
| H                                          | -2.342540349378 | -1.586548900849 | 2.459187116398     |
| C                                          | -2.672284118129 | -2.114476682207 | -1.531521853528    |
| H                                          | -2.240112333987 | -3.120789573478 | -1.550144534002    |
| H                                          | -3.762143470461 | -2.217545165685 | -1.546887481404    |
| H                                          | -2.365861536393 | -1.599136356704 | -2.446415259837    |
| C                                          | -2.668488902784 | 2.092405425177  | -1.555021818098    |
| H                                          | -3.759855215716 | 2.171613388439  | -1.590148295789    |
| H                                          | -2.257395275850 | 3.107470525811  | -1.575367873689    |
| H                                          | -2.335368584805 | 1.575404033018  | -2.459615198511    |
| C                                          | -2.683107764433 | 2.114378119119  | 1.530444237436     |
| H                                          | -2.251269746080 | 3.120588977277  | 1.554681420596     |
| H                                          | -3.773120139593 | 2.216537340590  | 1.539093931768     |
| H                                          | -2.382198720597 | 1.595975408007  | 2.445492654656     |
| Sum of electronic and zero-point Energies= |                 |                 | -1122.753405271423 |

**Table S10.** Atomic Coordinates of S3

| Atomic Type                                | Coordinates (Angstroms) |                 |                   |
|--------------------------------------------|-------------------------|-----------------|-------------------|
|                                            | X                       | Y               | Z                 |
| C                                          | -4.311068865680         | -0.713709018702 | -0.003321660333   |
| C                                          | -3.135207372997         | -1.404246280268 | -0.001591137965   |
| C                                          | -1.881237372268         | -0.716876036535 | 0.000752222356    |
| C                                          | -1.881493854415         | 0.716819952436  | 0.001747223849    |
| C                                          | -3.135667987469         | 1.404123911496  | 0.000277927982    |
| C                                          | -4.311362020701         | 0.713431145041  | -0.002345696799   |
| C                                          | -0.659919222272         | -1.395928107094 | 0.001597553471    |
| C                                          | -0.660430662745         | 1.396108491157  | 0.002755646938    |
| C                                          | 0.562718816142          | 0.723761867433  | 0.002423123672    |
| C                                          | 0.562914019776          | -0.723327593752 | 0.002238007323    |
| C                                          | 1.806761649532          | -1.449296961985 | 0.002297300959    |
| H                                          | 1.786898599030          | -2.536213900889 | 0.002915429779    |
| C                                          | 2.943760311085          | -0.712764554772 | 0.001143357020    |
| C                                          | 2.943562316748          | 0.712499216453  | -0.000190480009   |
| C                                          | 1.806715010834          | 1.449401307887  | 0.000847153573    |
| H                                          | -0.662109378516         | -2.484294421570 | 0.001352219632    |
| H                                          | -5.257189845107         | -1.246179303714 | -0.005555818382   |
| H                                          | -3.12959084370          | -2.491315807926 | -0.002354505559   |
| H                                          | -3.128932210066         | 2.491160550134  | 0.000734705805    |
| H                                          | -5.257633421366         | 1.245623467440  | -0.003983528083   |
| H                                          | -0.661734100362         | 2.484482005098  | 0.002879393593    |
| H                                          | 1.788416154598          | 2.536400365138  | 0.000092501751    |
| C                                          | 4.460857021291          | 0.785856632942  | -0.004972138355   |
| H                                          | 4.901312435860          | 1.238838610020  | -0.897465059648   |
| H                                          | 4.908637283547          | 1.243961015054  | 0.881128103842    |
| C                                          | 4.460935708534          | -0.785860157883 | -0.001703288906   |
| H                                          | 4.906777399250          | -1.239111592704 | 0.887905313904    |
| H                                          | 4.903173758621          | -1.243277328693 | -0.890927973318   |
| Sum of electronic and zero-point Energies= |                         |                 | -616.414584305392 |

**Table S11.** Atomic Coordinates of S4

| Atomic Type | Coordinates (Angstroms) |                 |                 |
|-------------|-------------------------|-----------------|-----------------|
|             | X                       | Y               | Z               |
| C           | 5.924038784099          | 0.714307856175  | 0.000102888127  |
| C           | 4.749219434519          | 1.405114451338  | -0.005999290790 |
| C           | 3.493530567691          | 0.718646641327  | -0.004776551037 |
| C           | 3.493834896628          | -0.717752503086 | 0.002186477432  |
| C           | 4.749469460447          | -1.404559092237 | 0.008215838200  |
| C           | 5.924281971022          | -0.713901215865 | 0.007496610866  |
| C           | 2.274778353307          | 1.399373119494  | -0.009080390142 |
| C           | 2.275361658581          | -1.398437756119 | 0.003783961376  |
| C           | 1.054244720114          | -0.719085225097 | -0.000138726162 |
| C           | 1.053727458324          | 0.720122144244  | -0.006272386932 |
| C           | -0.198137300172         | 1.416623159587  | -0.008010225393 |
| H           | -0.172705377750         | 2.505755620708  | -0.011695509330 |
| C           | -1.379481263346         | 0.728563130604  | -0.003958457797 |
| C           | -1.378425013989         | -0.727540864754 | -0.000358848794 |
| C           | -0.197132809934         | -1.415604373410 | 0.001809094638  |
| H           | 2.275354912404          | 2.487770145827  | -0.014214740942 |
| H           | 6.870414887626          | 1.246310101262  | -0.000316749328 |
| H           | 4.744030119420          | 2.492092959247  | -0.011742532281 |
| H           | 4.742622678837          | -2.491512545441 | 0.013968520988  |
| H           | 6.870748518113          | -1.245686122817 | 0.012701557853  |
| H           | 2.274504782636          | -2.486841129205 | 0.008988814827  |
| H           | -0.173121809033         | -2.504852657678 | 0.005097510266  |

|    |                 |                 |                 |
|----|-----------------|-----------------|-----------------|
| Si | -3.228775241153 | 1.172623024136  | 0.004685106650  |
| Si | -3.225545004051 | -1.175073351988 | -0.003504608564 |
| C  | -3.800796749886 | 2.114956027451  | -1.527568250002 |
| H  | -4.892694403729 | 2.190648537079  | -1.553499997166 |
| H  | -3.393344285275 | 3.131716617033  | -1.532894639888 |
| H  | -3.472082624579 | 1.615408259071  | -2.443497532476 |
| C  | -3.781987465547 | 2.093058240180  | 1.556868274229  |
| H  | -3.360885038492 | 3.104065286938  | 1.578836744849  |
| H  | -4.872593769174 | 2.183050221020  | 1.590420252990  |
| H  | -3.454951965979 | 1.572239358658  | 2.461481661767  |
| C  | -3.781728915887 | -2.097404038019 | -1.553388435739 |
| H  | -3.362671489491 | -3.109182223519 | -1.575374495791 |
| H  | -4.872503451323 | -2.184910188624 | -1.585625146262 |
| H  | -3.454506601677 | -1.577587576216 | -2.458561854155 |
| C  | -3.794270074389 | -2.111334405014 | 1.533432698166  |
| H  | -4.885581683830 | -2.195987432827 | 1.555202832983  |
| H  | -3.378150302275 | -3.124474869857 | 1.548715409800  |
| H  | -3.474036841534 | -1.601266147545 | 2.446581297755  |

Sum of electronic and zero-point Energies= -1276.281766942077

**Table S12.** Atomic Coordinates of **1a<sub>m</sub>**

| Atomic Type | Coordinates (Angstroms) |                 |                 |
|-------------|-------------------------|-----------------|-----------------|
|             | X                       | Y               | Z               |
| C           | 2.971707154705          | 0.689777236734  | 0.051097715747  |
| C           | 2.971263861553          | -0.690622453283 | -0.050702558393 |
| C           | 1.753524448734          | -1.402550171747 | -0.103120287708 |
| C           | 0.555691019864          | -0.712781685737 | -0.049439214387 |
| C           | 0.556210866765          | 0.713043261453  | 0.049329455019  |
| C           | 1.754330432673          | 1.402278654968  | 0.103441851814  |
| H           | 1.773035179894          | -2.486326122698 | -0.202405762491 |
| H           | 1.774253932662          | 2.485999971783  | 0.203211945397  |
| C           | -2.121948105678         | 2.682031941987  | -0.268704634492 |
| H           | -1.765962643872         | 2.977297332871  | -1.261873385159 |
| H           | -3.210531367700         | 2.571123583349  | -0.301181603163 |
| H           | -1.886178156883         | 3.489611775233  | 0.433806966044  |
| C           | -2.122593152312         | -2.680759439647 | 0.271707933754  |
| H           | -3.210473821680         | -2.566099330321 | 0.314072584356  |
| H           | -1.895918946966         | -3.488411805408 | -0.433673384847 |
| H           | -1.758765393823         | -2.978058042549 | 1.261430077610  |
| Si          | -1.312291704037         | 1.064982567730  | 0.285616421342  |
| Si          | -1.312948117427         | -1.065294917417 | -0.287667868939 |
| H           | 3.913804340159          | 1.231312625468  | 0.096640850786  |
| H           | 3.913057792185          | -1.232748504423 | -0.096067469959 |

Sum of electronic and zero-point Energies= -889.426881106294

**Table S13.** Atomic Coordinates of **3<sub>m</sub>**

| Atomic Type | Coordinates (Angstroms) |                 |                 |
|-------------|-------------------------|-----------------|-----------------|
|             | X                       | Y               | Z               |
| C           | 1.834151489196          | 0.708081555538  | 0.028498827555  |
| C           | 1.834169493085          | -0.711289197987 | -0.025861115147 |
| C           | 0.577803779235          | -1.415136611625 | -0.055107405108 |
| C           | -0.596280008973         | -0.730870706448 | -0.024385677476 |
| C           | -0.595810225293         | 0.727343605864  | 0.027189535975  |
| C           | 0.578054939510          | 1.411717483702  | 0.059008684362  |
| H           | 0.603921218374          | -2.501701654082 | -0.117285471019 |
| H           | 0.603711622319          | 2.498339708781  | 0.121383409233  |
| C           | -3.287096902929         | 2.683608690310  | -0.236304381483 |
| H           | -2.934857045463         | 3.026356585162  | -1.212871987486 |
| H           | -4.371551970842         | 2.555294436688  | -0.274555372050 |
| H           | -3.061598418683         | 3.456308368395  | 0.504480141670  |
| C           | -3.305480983939         | -2.674912455248 | 0.233083911563  |
| H           | -4.379412653813         | -2.509654500132 | 0.349891285963  |
| H           | -3.159657071603         | -3.428206999632 | -0.546350618733 |
| H           | -2.902075052022         | -3.063388412368 | 1.171950902649  |
| Si          | -2.451995354813         | 1.063315826410  | 0.234300209416  |
| Si          | -2.453238912510         | -1.061936167908 | -0.235042564104 |
| C           | 3.066270306934          | 1.391286350790  | 0.055723123821  |
| C           | 4.260957191590          | 0.701463799371  | 0.026492736243  |
| H           | 3.060305333647          | 2.477832095741  | 0.097531043650  |
| H           | 5.202280237660          | 1.242094502385  | 0.045177769338  |
| C           | 3.066572946939          | -1.393769670195 | -0.056085657277 |
| C           | 4.261062770848          | -0.703188214641 | -0.029601466341 |
| H           | 3.061473499942          | -2.480324620267 | -0.098317719514 |

|                                            |                |                 |                    |
|--------------------------------------------|----------------|-----------------|--------------------|
| H                                          | 5.202403882734 | -1.243791828177 | -0.051992228090    |
| Sum of electronic and zero-point Energies= |                |                 | -1042.946336387005 |

**Table S14.** Atomic Coordinates of **4<sub>m</sub>**

| Atomic Type                                | Coordinates (Angstroms) |                 |                    |
|--------------------------------------------|-------------------------|-----------------|--------------------|
|                                            | X                       | Y               | Z                  |
| C                                          | 5.525673330900          | 0.710353304243  | -0.023200425630    |
| C                                          | 4.344580187409          | 1.400283652108  | -0.049618893363    |
| C                                          | 3.097378002492          | 0.713650970845  | -0.026433823740    |
| C                                          | 3.097790031624          | -0.714381065371 | 0.024939101055     |
| C                                          | 4.345563374459          | -1.400350120584 | 0.051070498352     |
| C                                          | 5.526234600016          | -0.709646353083 | 0.028207919366     |
| C                                          | 1.865407927817          | 1.395079920883  | -0.050898771971    |
| C                                          | 1.866130083507          | -1.396201485281 | 0.047733586457     |
| C                                          | 0.657670166708          | -0.719893505114 | 0.021636793113     |
| C                                          | 0.657399222307          | 0.718446498062  | -0.025242189139    |
| C                                          | -0.609675477151         | 1.419757113030  | -0.047084994097    |
| H                                          | -0.583541679009         | 2.506700161173  | -0.099460768885    |
| C                                          | -1.777549826596         | 0.735722805976  | -0.019097237750    |
| C                                          | -1.777596113169         | -0.737010484190 | 0.015890663475     |
| C                                          | -0.609500920525         | -1.421063407854 | 0.043845772372     |
| H                                          | 1.867046422109          | 2.482932440111  | -0.088825639485    |
| H                                          | 6.471284881881          | 1.245277339778  | -0.041267700635    |
| H                                          | 4.338774588021          | 2.486674649939  | -0.089284465048    |
| H                                          | 4.339103111551          | -2.486735804356 | 0.090356449674     |
| H                                          | 6.471284881881          | -1.243651563945 | 0.049268770955     |
| H                                          | 1.866873718590          | -2.484071577887 | 0.085655196303     |
| H                                          | -0.584306208535         | -2.508001275928 | 0.098124937304     |
| Si                                         | -3.626506174598         | -1.065153555226 | 0.209287237526     |
| Si                                         | -3.627014959914         | 1.065900152822  | -0.209360198133    |
| C                                          | -4.493096422347         | -2.675413586466 | -0.233663494771    |
| H                                          | -4.147050640102         | -3.040562619828 | -1.204204707445    |
| H                                          | -4.286885058359         | -3.441308576992 | 0.519367540220     |
| H                                          | -5.574039463063         | -2.522248454582 | -0.277595073689    |
| C                                          | -4.486231656502         | 2.677931557491  | 0.239923629105     |
| H                                          | -5.570668245262         | 2.545150513850  | 0.237204639152     |
| H                                          | -4.172271517347         | 3.014160417327  | 1.231642023894     |
| H                                          | -4.235745154115         | 3.457514497627  | -0.485239016221    |
| Sum of electronic and zero-point Energies= |                         |                 | -1196.478728303493 |

**Table S15.** Atomic Coordinates of **5**

| Atomic Type                                | Coordinates (Angstroms) |                 |                   |
|--------------------------------------------|-------------------------|-----------------|-------------------|
|                                            | X                       | Y               | Z                 |
| C                                          | -0.511431900441         | 0.710801010728  | -0.000011016021   |
| C                                          | 0.634782276522          | 1.443698729702  | -0.000052256044   |
| C                                          | 0.634630863226          | -1.443737396121 | -0.000024325431   |
| C                                          | -0.511571534317         | -0.710793815479 | -0.000021914449   |
| H                                          | 0.656156157720          | 2.530340233472  | 0.000009116895    |
| H                                          | 0.656069297499          | -2.530377705112 | -0.000041754975   |
| C                                          | -2.030685239119         | -0.675339910257 | -0.000024627560   |
| C                                          | -2.030615704473         | 0.675458619277  | 0.000061423996    |
| H                                          | -2.809156486979         | 1.430297696412  | 0.000203865699    |
| H                                          | -2.809212644121         | -1.430189619330 | -0.000064463760   |
| C                                          | 1.853048830367          | -0.688641317980 | 0.000065416408    |
| C                                          | 1.853165240940          | 0.688562762169  | -0.000025998669   |
| H                                          | 2.80008003713           | -1.222609315741 | 0.000172301203    |
| H                                          | 2.800136084996          | 1.222435334757  | 0.000117405765    |
| Sum of electronic and zero-point Energies= |                         |                 | -308.132659819679 |

**Table S16.** Atomic Coordinates of **6**

| Atomic Type | Coordinates (Angstroms) |                 |                 |
|-------------|-------------------------|-----------------|-----------------|
|             | X                       | Y               | Z               |
| C           | -1.755091909614         | 0.724757310253  | -0.000388391859 |
| C           | -0.629197343214         | 1.454602660406  | 0.001348464213  |
| C           | 0.626599187395          | 0.712726167696  | 0.001025151340  |
| C           | 0.626429638347          | -0.712368232135 | 0.001128341898  |
| C           | -0.629269622183         | -1.454469259996 | 0.000517389389  |

|                                            |                 |                 |                   |
|--------------------------------------------|-----------------|-----------------|-------------------|
| C                                          | -1.755155333342 | -0.724700168357 | -0.001026789650   |
| H                                          | 1.852444118499  | 2.476127793488  | -0.000000514003   |
| H                                          | -0.604549208492 | 2.540702784841  | 0.003301026458    |
| C                                          | 1.855908348642  | 1.388864640210  | -0.000320289340   |
| C                                          | 1.855634500264  | -1.388912547656 | 0.000948936103    |
| H                                          | -0.604545371742 | -2.540597885312 | 0.000308532951    |
| C                                          | 3.056979091837  | -0.699572224703 | -0.000618908057   |
| C                                          | 3.057156488689  | 0.699216610899  | -0.001553022521   |
| H                                          | 1.851620825295  | -2.476168112898 | 0.000576537968    |
| H                                          | 3.995641183575  | -1.244817324455 | -0.000693229338   |
| H                                          | 3.995908932857  | 1.244405923272  | -0.001996724057   |
| C                                          | -3.256268174084 | -0.675749573937 | -0.000861191395   |
| C                                          | -3.256346204123 | 0.675645826682  | -0.000392890391   |
| H                                          | -4.037067110793 | 1.426331422682  | 0.000896955950    |
| H                                          | -4.036875888718 | -1.426475274432 | -0.000092183410   |
| -----                                      |                 |                 |                   |
| Sum of electronic and zero-point Energies= |                 |                 | -461.657092163119 |

**Table S17.** Atomic Coordinates of **7**

| Atomic Type                                | Coordinates (Angstroms) |                 |                   |
|--------------------------------------------|-------------------------|-----------------|-------------------|
|                                            | X                       | Y               | Z                 |
| C                                          | -4.266528622105         | -0.709435687389 | -0.002229868192   |
| C                                          | -3.083333510865         | -1.400385002053 | -0.000245277705   |
| C                                          | -1.840215938212         | -0.712121934160 | 0.001281140143    |
| C                                          | -1.840549580704         | 0.712333408849  | 0.000925973339    |
| C                                          | -3.084179353030         | 1.400152963119  | -0.000635858125   |
| C                                          | -4.267012321968         | 0.708681231936  | -0.002377260098   |
| C                                          | -0.601863731737         | -1.393035314561 | 0.002102228286    |
| C                                          | -0.602478689751         | 1.393511006593  | 0.001640770281    |
| C                                          | 0.604112337800          | 0.724602511647  | 0.001769482656    |
| C                                          | 0.604356315175          | -0.723828612273 | 0.001827910826    |
| C                                          | 1.868651426451          | -1.462352017080 | 0.000705019377    |
| H                                          | 1.844004334342          | -2.548388250195 | 0.000126928081    |
| C                                          | 2.988976159171          | -0.730817632262 | -0.000368868355   |
| C                                          | 2.988766113492          | 0.730450072758  | 0.000117223050    |
| C                                          | 1.868752858138          | 1.462597420340  | 0.001192561729    |
| H                                          | -0.605714363152         | -2.481446936808 | 0.002236935700    |
| H                                          | -5.210651436308         | -1.245454159147 | -0.003872706259   |
| H                                          | -3.077426342215         | -2.487485017416 | 0.000189619793    |
| H                                          | -3.077511277795         | 2.487235132779  | -0.000745891456   |
| H                                          | -5.211516472168         | 1.244001135223  | -0.003946156361   |
| H                                          | -0.605421383795         | 2.481939027853  | 0.001326420787    |
| H                                          | 1.845995631995          | 2.548737345414  | 0.000703171323    |
| C                                          | 4.481362169851          | -0.677676591008 | -0.002786570693   |
| C                                          | 4.481225761210          | 0.677400064969  | -0.001980386825   |
| H                                          | 5.263023176506          | -1.427529585017 | -0.004591154670   |
| H                                          | 5.262676669119          | 1.427487704926  | -0.002598388108   |
| -----                                      |                         |                 |                   |
| Sum of electronic and zero-point Energies= |                         |                 | -615.191594110860 |

**Table S18.** Transition Energy, Wavelength, and Oscillator Strengths of the Electronic Transition of **1a<sub>opt</sub>**.

|                    |              |           |                    |              |           |
|--------------------|--------------|-----------|--------------------|--------------|-----------|
| Excited State 1:   | Singlet-A    | 1.8677 eV | Excited State 14:  | Singlet-A    | 3.8735 eV |
| 663.82 nm f=0.0515 | <S**2>=0.000 |           | 320.09 nm f=0.0052 | <S**2>=0.000 |           |
| 163 -> 164         | 0.70136      |           | 161 -> 164         | -0.21695     |           |
| 163 -> 169         | -0.10699     |           | 163 -> 177         | 0.64842      |           |
|                    |              |           | 163 -> 179         | 0.14077      |           |
| Excited State 2:   | Singlet-A    | 2.7890 eV | Excited State 15:  | Singlet-A    | 3.9338 eV |
| 444.54 nm f=0.0057 | <S**2>=0.000 |           | 315.18 nm f=0.0073 | <S**2>=0.000 |           |
| 163 -> 166         | 0.70359      |           | 159 -> 164         | 0.12997      |           |
| Excited State 3:   | Singlet-A    | 2.9522 eV | 161 -> 164         | 0.58944      |           |
| 419.97 nm f=0.0002 | <S**2>=0.000 |           | 163 -> 177         | 0.16478      |           |
| 163 -> 167         | 0.70347      |           | 163 -> 179         | 0.28311      |           |
| Excited State 4:   | Singlet-A    | 3.0550 eV | Excited State 16:  | Singlet-A    | 3.9512 eV |
| 405.85 nm f=0.0723 | <S**2>=0.000 |           | 313.79 nm f=0.0025 | <S**2>=0.000 |           |
| 162 -> 164         | -0.15962     |           | 162 -> 164         | -0.12932     |           |
| 163 -> 165         | 0.65352      |           | 163 -> 178         | 0.68830      |           |
| 163 -> 170         | -0.17882     |           | Excited State 17:  | Singlet-A    | 3.9692 eV |
| Excited State 5:   | Singlet-A    | 3.0923 eV | 312.37 nm f=0.0089 | <S**2>=0.000 |           |
| 400.94 nm f=0.0006 | <S**2>=0.000 |           | 161 -> 164         | -0.23237     |           |
| 163 -> 168         | 0.70402      |           | 163 -> 177         | -0.21279     |           |
| Excited State 6:   | Singlet-A    | 3.2863 eV | 163 -> 179         | 0.62819      |           |
| 377.27 nm f=0.0112 | <S**2>=0.000 |           | Excited State 18:  | Singlet-A    | 4.0069 eV |
| 163 -> 165         | 0.16361      |           | 309.42 nm f=0.0032 | <S**2>=0.000 |           |
| 163 -> 170         | 0.68143      |           | 163 -> 180         | 0.68123      |           |
| Excited State 7:   | Singlet-A    | 3.4112 eV | 163 -> 181         | -0.15192     |           |
| 363.47 nm f=0.0352 | <S**2>=0.000 |           | Excited State 19:  | Singlet-A    | 4.0122 eV |
| 163 -> 169         | 0.55996      |           | 309.02 nm f=0.0864 | <S**2>=0.000 |           |
| 163 -> 172         | 0.38741      |           | 158 -> 164         | 0.14396      |           |
| Excited State 8:   | Singlet-A    | 3.4576 eV | 162 -> 164         | 0.55238      |           |
| 358.59 nm f=0.0002 | <S**2>=0.000 |           | 163 -> 165         | 0.14659      |           |
| 163 -> 171         | 0.68393      |           | 163 -> 178         | 0.15455      |           |
| 163 -> 174         | 0.16324      |           | 163 -> 180         | -0.15240     |           |
| Excited State 9:   | Singlet-A    | 3.4886 eV | 163 -> 181         | -0.25259     |           |
| 355.39 nm f=0.0221 | <S**2>=0.000 |           | Excited State 20:  | Singlet-A    | 4.0709 eV |
| 163 -> 169         | -0.29900     |           | 304.56 nm f=0.0016 | <S**2>=0.000 |           |
| 163 -> 172         | 0.54931      |           | 163 -> 181         | -0.11056     |           |
| 163 -> 173         | 0.28519      |           | 163 -> 182         | 0.67198      |           |
| Excited State 10:  | Singlet-A    | 3.5141 eV | 163 -> 183         | 0.17190      |           |
| 352.81 nm f=0.0135 | <S**2>=0.000 |           | Excited State 21:  | Singlet-A    | 4.0769 eV |
| 163 -> 169         | 0.17352      |           | 304.12 nm f=0.0035 | <S**2>=0.000 |           |
| 163 -> 172         | -0.20621     |           | 163 -> 182         | -0.18290     |           |
| 163 -> 173         | 0.64325      |           | 163 -> 183         | 0.67975      |           |
| Excited State 11:  | Singlet-A    | 3.5678 eV | Excited State 22:  | Singlet-A    | 4.0881 eV |
| 347.51 nm f=0.0026 | <S**2>=0.000 |           | 303.28 nm f=0.0172 | <S**2>=0.000 |           |
| 162 -> 164         | 0.13501      |           | 158 -> 164         | 0.13705      |           |
| 163 -> 171         | -0.14643     |           | 162 -> 164         | 0.20701      |           |
| 163 -> 174         | 0.67028      |           | 163 -> 181         | 0.61151      |           |
| Excited State 12:  | Singlet-A    | 3.6612 eV | 163 -> 182         | 0.10860      |           |
| 338.64 nm f=0.0052 | <S**2>=0.000 |           | Excited State 23:  | Singlet-A    | 4.1723 eV |
| 163 -> 175         | 0.69540      |           | 297.16 nm f=0.0053 | <S**2>=0.000 |           |
| Excited State 13:  | Singlet-A    | 3.8126 eV | 158 -> 164         | 0.24036      |           |
| 325.20 nm f=0.0021 | <S**2>=0.000 |           | 160 -> 164         | 0.65932      |           |
| 162 -> 164         | 0.13489      |           | Excited State 24:  | Singlet-A    | 4.2067 eV |
| 163 -> 176         | 0.69213      |           | 294.73 nm f=0.0223 | <S**2>=0.000 |           |
|                    |              |           | 158 -> 164         | 0.10240      |           |
|                    |              |           | 163 -> 184         | 0.68914      |           |

|                   |           |              |            |         |  |
|-------------------|-----------|--------------|------------|---------|--|
| Excited State 25: | Singlet-A | 4.2208 eV    | 163 -> 190 | 0.68995 |  |
| 293.74 nm         | f=0.0075  | <S**2>=0.000 |            |         |  |
| 159 -> 164        |           | -0.27973     |            |         |  |
| 163 -> 185        |           | 0.64580      |            |         |  |
| Excited State 26: | Singlet-A | 4.2775 eV    |            |         |  |
| 289.85 nm         | f=0.0607  | <S**2>=0.000 |            |         |  |
| 157 -> 164        |           | -0.20685     |            |         |  |
| 159 -> 164        |           | 0.50654      |            |         |  |
| 163 -> 185        |           | 0.22884      |            |         |  |
| 163 -> 186        |           | -0.33903     |            |         |  |
| 163 -> 189        |           | 0.10278      |            |         |  |
| Excited State 27: | Singlet-A | 4.2899 eV    |            |         |  |
| 289.02 nm         | f=0.0229  | <S**2>=0.000 |            |         |  |
| 158 -> 164        |           | 0.61434      |            |         |  |
| 160 -> 164        |           | -0.21918     |            |         |  |
| 162 -> 164        |           | -0.16007     |            |         |  |
| 163 -> 187        |           | 0.10575      |            |         |  |
| Excited State 28: | Singlet-A | 4.3048 eV    |            |         |  |
| 288.01 nm         | f=0.0131  | <S**2>=0.000 |            |         |  |
| 157 -> 164        |           | -0.17814     |            |         |  |
| 159 -> 164        |           | 0.23949      |            |         |  |
| 163 -> 185        |           | 0.13181      |            |         |  |
| 163 -> 186        |           | 0.61485      |            |         |  |
| Excited State 29: | Singlet-A | 4.3109 eV    |            |         |  |
| 287.61 nm         | f=0.0013  | <S**2>=0.000 |            |         |  |
| 163 -> 187        |           | 0.69604      |            |         |  |
| Excited State 30: | Singlet-A | 4.4012 eV    |            |         |  |
| 281.71 nm         | f=0.0001  | <S**2>=0.000 |            |         |  |
| 163 -> 188        |           | 0.70347      |            |         |  |
| Excited State 31: | Singlet-A | 4.4413 eV    |            |         |  |
| 279.16 nm         | f=0.0170  | <S**2>=0.000 |            |         |  |
| 157 -> 164        |           | 0.17693      |            |         |  |
| 163 -> 189        |           | 0.67945      |            |         |  |
| Excited State 32: | Singlet-A | 4.4662 eV    |            |         |  |
| 277.60 nm         | f=0.0022  | <S**2>=0.000 |            |         |  |
| 156 -> 164        |           | 0.68245      |            |         |  |
| 163 -> 190        |           | 0.14475      |            |         |  |
| Excited State 33: | Singlet-A | 4.4743 eV    |            |         |  |
| 277.10 nm         | f=0.0012  | <S**2>=0.000 |            |         |  |
| 156 -> 164        |           | -0.14362     |            |         |  |
| Excited State 34: | Singlet-A | 4.5534 eV    |            |         |  |
| 272.29 nm         | f=0.0368  | <S**2>=0.000 |            |         |  |
| 155 -> 164        |           | -0.11677     |            |         |  |
| 157 -> 164        |           | 0.48719      |            |         |  |
| 159 -> 164        |           | 0.15316      |            |         |  |
| 163 -> 189        |           | -0.11978     |            |         |  |
| 163 -> 191        |           | 0.38314      |            |         |  |
| 163 -> 192        |           | -0.13284     |            |         |  |
| Excited State 35: | Singlet-A | 4.6194 eV    |            |         |  |
| 268.40 nm         | f=0.0045  | <S**2>=0.000 |            |         |  |
| 155 -> 164        |           | 0.13132      |            |         |  |
| 157 -> 164        |           | -0.23452     |            |         |  |
| 163 -> 191        |           | 0.56080      |            |         |  |
| 163 -> 192        |           | 0.28732      |            |         |  |
| Excited State 36: | Singlet-A | 4.6570 eV    |            |         |  |
| 266.23 nm         | f=0.0174  | <S**2>=0.000 |            |         |  |
| 155 -> 164        |           | -0.18567     |            |         |  |
| 157 -> 164        |           | 0.14732      |            |         |  |
| 163 -> 191        |           | -0.15810     |            |         |  |
| 163 -> 192        |           | 0.61796      |            |         |  |
| 163 -> 194        |           | 0.10127      |            |         |  |
| Excited State 37: | Singlet-A | 4.6866 eV    |            |         |  |
| 264.55 nm         | f=0.0003  | <S**2>=0.000 |            |         |  |
| 163 -> 193        |           | 0.69776      |            |         |  |
| Excited State 38: | Singlet-A | 4.7313 eV    |            |         |  |
| 262.05 nm         | f=0.0031  | <S**2>=0.000 |            |         |  |
| 155 -> 164        |           | 0.49145      |            |         |  |
| 163 -> 194        |           | 0.48876      |            |         |  |
| Excited State 39: | Singlet-A | 4.7359 eV    |            |         |  |
| 261.79 nm         | f=0.0004  | <S**2>=0.000 |            |         |  |
| 154 -> 164        |           | 0.70370      |            |         |  |
| Excited State 40: | Singlet-A | 4.7432 eV    |            |         |  |
| 261.39 nm         | f=0.0027  | <S**2>=0.000 |            |         |  |
| 155 -> 164        |           | 0.20202      |            |         |  |
| 163 -> 194        |           | -0.32357     |            |         |  |
| 163 -> 195        |           | 0.57963      |            |         |  |

**Table S19.** Transition Energy, Wavelength, and Oscillator Strengths of the Electronic Transition of **3<sub>opt</sub>**.

|                    |              |           |                    |              |           |
|--------------------|--------------|-----------|--------------------|--------------|-----------|
| Excited State 1:   | Singlet-A    | 2.0950 eV | Excited State 14:  | Singlet-A    | 3.7454 eV |
| 591.82 nm f=0.0588 | <S**2>=0.000 |           | 331.03 nm f=0.0094 | <S**2>=0.000 |           |
| 176 -> 177         | 0.69559      |           | 176 -> 189         | 0.70454      |           |
| 176 -> 182         | -0.10468     |           |                    |              |           |
| Excited State 2:   | Singlet-A    | 2.6598 eV | Excited State 15:  | Singlet-A    | 3.9608 eV |
| 466.13 nm f=0.1351 | <S**2>=0.000 |           | 313.03 nm f=0.0043 | <S**2>=0.000 |           |
| 175 -> 177         | -0.28909     |           | 176 -> 191         | 0.69281      |           |
| 176 -> 178         | 0.64121      |           | 176 -> 193         | -0.11368     |           |
| Excited State 3:   | Singlet-A    | 2.8932 eV | Excited State 16:  | Singlet-A    | 3.9885 eV |
| 428.53 nm f=0.0050 | <S**2>=0.000 |           | 310.86 nm f=0.0085 | <S**2>=0.000 |           |
| 176 -> 179         | 0.70292      |           | 176 -> 190         | 0.67930      |           |
|                    |              |           | 176 -> 192         | 0.16442      |           |
| Excited State 4:   | Singlet-A    | 3.0425 eV | Excited State 17:  | Singlet-A    | 4.0088 eV |
| 407.50 nm f=0.0000 | <S**2>=0.000 |           | 309.28 nm f=0.0005 | <S**2>=0.000 |           |
| 176 -> 180         | 0.70628      |           | 176 -> 190         | -0.16716     |           |
|                    |              |           | 176 -> 192         | 0.65160      |           |
| Excited State 5:   | Singlet-A    | 3.2121 eV | 176 -> 193         | -0.21068     |           |
| 385.99 nm f=0.0003 | <S**2>=0.000 |           | Excited State 18:  | Singlet-A    | 4.0280 eV |
| 176 -> 181         | 0.65846      |           | 307.81 nm f=0.0131 | <S**2>=0.000 |           |
| 176 -> 182         | 0.25368      |           | 176 -> 191         | 0.10515      |           |
| Excited State 6:   | Singlet-A    | 3.3271 eV | 176 -> 192         | 0.20549      |           |
| 372.65 nm f=0.0100 | <S**2>=0.000 |           | 176 -> 193         | 0.64416      |           |
| 175 -> 177         | 0.10723      |           | 176 -> 194         | -0.13587     |           |
| 176 -> 183         | 0.64035      |           | Excited State 19:  | Singlet-A    | 4.0498 eV |
| 176 -> 184         | -0.26195     |           | 306.15 nm f=0.0066 | <S**2>=0.000 |           |
| Excited State 7:   | Singlet-A    | 3.3924 eV | 174 -> 177         | 0.52118      |           |
| 365.47 nm f=0.3227 | <S**2>=0.000 |           | 175 -> 178         | 0.44692      |           |
| 175 -> 177         | 0.60473      |           | Excited State 20:  | Singlet-A    | 4.1180 eV |
| 176 -> 178         | 0.25383      |           | 301.08 nm f=0.0002 | <S**2>=0.000 |           |
| 176 -> 183         | -0.11672     |           | 176 -> 194         | -0.33175     |           |
| 176 -> 188         | 0.15466      |           | 176 -> 195         | 0.62097      |           |
| Excited State 8:   | Singlet-A    | 3.4341 eV | Excited State 21:  | Singlet-A    | 4.1339 eV |
| 361.04 nm f=0.0516 | <S**2>=0.000 |           | 299.92 nm f=0.0015 | <S**2>=0.000 |           |
| 174 -> 177         | 0.17845      |           | 176 -> 193         | 0.10948      |           |
| 176 -> 181         | -0.22654     |           | 176 -> 194         | 0.57925      |           |
| 176 -> 182         | 0.61671      |           | 176 -> 195         | 0.32971      |           |
| Excited State 9:   | Singlet-A    | 3.4689 eV | 176 -> 196         | 0.16675      |           |
| 357.41 nm f=0.0007 | <S**2>=0.000 |           | Excited State 22:  | Singlet-A    | 4.1504 eV |
| 176 -> 183         | 0.23654      |           | 298.73 nm f=0.0020 | <S**2>=0.000 |           |
| 176 -> 184         | 0.58888      |           | 176 -> 194         | -0.15559     |           |
| 176 -> 185         | 0.29166      |           | 176 -> 196         | 0.68248      |           |
| Excited State 10:  | Singlet-A    | 3.5163 eV | Excited State 23:  | Singlet-A    | 4.1739 eV |
| 352.60 nm f=0.0000 | <S**2>=0.000 |           | 297.04 nm f=0.0084 | <S**2>=0.000 |           |
| 176 -> 183         | -0.10938     |           | 173 -> 177         | 0.10296      |           |
| 176 -> 184         | -0.26428     |           | 175 -> 178         | -0.10979     |           |
| 176 -> 185         | 0.64304      |           | 176 -> 197         | 0.68006      |           |
| Excited State 11:  | Singlet-A    | 3.5699 eV | Excited State 24:  | Singlet-A    | 4.1918 eV |
| 347.31 nm f=0.0039 | <S**2>=0.000 |           | 295.78 nm f=0.0389 | <S**2>=0.000 |           |
| 176 -> 186         | 0.70186      |           | 173 -> 177         | -0.28297     |           |
| Excited State 12:  | Singlet-A    | 3.6193 eV | 174 -> 177         | -0.29743     |           |
| 342.56 nm f=0.0027 | <S**2>=0.000 |           | 175 -> 178         | 0.40134      |           |
| 176 -> 187         | 0.70168      |           | 176 -> 197         | 0.19088      |           |
| Excited State 13:  | Singlet-A    | 3.7062 eV | 176 -> 198         | 0.28074      |           |
| 334.53 nm f=0.0475 | <S**2>=0.000 |           | 176 -> 199         | 0.11737      |           |
| 175 -> 177         | -0.12205     |           |                    |              |           |
| 176 -> 188         | 0.67077      |           |                    |              |           |

|                    |              |           |            |         |
|--------------------|--------------|-----------|------------|---------|
| Excited State 25:  | Singlet-A    | 4.2391 eV | 176 -> 201 | 0.67649 |
| 292.47 nm f=0.0058 | <S**2>=0.000 |           |            |         |
| 173 -> 177         | 0.24849      |           |            |         |
| 174 -> 177         | 0.10308      |           |            |         |
| 175 -> 178         | -0.12149     |           |            |         |
| 176 -> 198         | 0.63197      |           |            |         |
| Excited State 26:  | Singlet-A    | 4.2873 eV |            |         |
| 289.19 nm f=0.0188 | <S**2>=0.000 |           |            |         |
| 174 -> 178         | 0.10475      |           |            |         |
| 175 -> 179         | 0.68623      |           |            |         |
| Excited State 27:  | Singlet-A    | 4.3226 eV |            |         |
| 286.83 nm f=0.0165 | <S**2>=0.000 |           |            |         |
| 173 -> 177         | 0.35870      |           |            |         |
| 176 -> 199         | 0.59624      |           |            |         |
| Excited State 28:  | Singlet-A    | 4.3607 eV |            |         |
| 284.32 nm f=0.0128 | <S**2>=0.000 |           |            |         |
| 176 -> 200         | 0.67783      |           |            |         |
| 176 -> 201         | 0.15557      |           |            |         |
| Excited State 29:  | Singlet-A    | 4.3869 eV |            |         |
| 282.62 nm f=0.0110 | <S**2>=0.000 |           |            |         |
| 171 -> 177         | 0.23201      |           |            |         |
| 172 -> 177         | 0.63041      |           |            |         |
| 173 -> 177         | 0.12759      |           |            |         |
| Excited State 30:  | Singlet-A    | 4.3982 eV |            |         |
| 281.90 nm f=0.0849 | <S**2>=0.000 |           |            |         |
| 170 -> 177         | -0.14421     |           |            |         |
| 171 -> 177         | -0.20893     |           |            |         |
| 172 -> 177         | -0.12352     |           |            |         |
| 173 -> 177         | 0.38335      |           |            |         |
| 174 -> 177         | -0.17824     |           |            |         |
| 175 -> 178         | 0.17978      |           |            |         |
| 175 -> 180         | -0.16885     |           |            |         |
| 176 -> 199         | -0.30751     |           |            |         |
| 176 -> 202         | 0.18590      |           |            |         |
| Excited State 31:  | Singlet-A    | 4.4002 eV |            |         |
| 281.77 nm f=0.0057 | <S**2>=0.000 |           |            |         |
| 171 -> 177         | 0.62519      |           |            |         |
| 172 -> 177         | -0.26707     |           |            |         |
| Excited State 32:  | Singlet-A    | 4.4145 eV |            |         |
| 280.85 nm f=0.0048 | <S**2>=0.000 |           |            |         |
| 176 -> 200         | -0.14970     |           |            |         |
| Excited State 33:  | Singlet-A    | 4.4241 eV |            |         |
| 280.25 nm f=0.0092 | <S**2>=0.000 |           |            |         |
| 175 -> 180         | 0.68154      |           |            |         |
| Excited State 34:  | Singlet-A    | 4.4659 eV |            |         |
| 277.62 nm f=0.0300 | <S**2>=0.000 |           |            |         |
| 173 -> 177         | -0.12489     |           |            |         |
| 176 -> 202         | 0.66895      |           |            |         |
| Excited State 35:  | Singlet-A    | 4.5215 eV |            |         |
| 274.21 nm f=0.0002 | <S**2>=0.000 |           |            |         |
| 176 -> 203         | 0.70028      |           |            |         |
| Excited State 36:  | Singlet-A    | 4.5634 eV |            |         |
| 271.69 nm f=0.0018 | <S**2>=0.000 |           |            |         |
| 176 -> 204         | 0.70475      |           |            |         |
| Excited State 37:  | Singlet-A    | 4.5812 eV |            |         |
| 270.63 nm f=0.0003 | <S**2>=0.000 |           |            |         |
| 174 -> 178         | -0.18442     |           |            |         |
| 175 -> 181         | 0.66098      |           |            |         |
| 175 -> 182         | 0.14205      |           |            |         |
| Excited State 38:  | Singlet-A    | 4.6104 eV |            |         |
| 268.92 nm f=0.0071 | <S**2>=0.000 |           |            |         |
| 170 -> 177         | 0.64254      |           |            |         |
| 174 -> 177         | -0.10041     |           |            |         |
| 176 -> 205         | 0.11015      |           |            |         |
| 176 -> 206         | -0.16523     |           |            |         |
| Excited State 39:  | Singlet-A    | 4.6269 eV |            |         |
| 267.96 nm f=0.0140 | <S**2>=0.000 |           |            |         |
| 168 -> 177         | 0.18172      |           |            |         |
| 169 -> 177         | 0.53679      |           |            |         |
| 174 -> 178         | -0.28588     |           |            |         |
| 175 -> 182         | -0.28760     |           |            |         |
| Excited State 40:  | Singlet-A    | 4.6325 eV |            |         |
| 267.64 nm f=0.0014 | <S**2>=0.000 |           |            |         |
| 168 -> 177         | 0.11880      |           |            |         |
| 169 -> 177         | 0.38548      |           |            |         |
| 174 -> 178         | 0.38776      |           |            |         |
| 175 -> 182         | 0.42612      |           |            |         |



**Table S20.** Transition Energy, Wavelength, and Oscillator Strengths of the Electronic Transition of **4<sub>opt</sub>**.

|                                                                                                                                                                                         |                                                                                                                                                                    |
|-----------------------------------------------------------------------------------------------------------------------------------------------------------------------------------------|--------------------------------------------------------------------------------------------------------------------------------------------------------------------|
| Excited State 1: Singlet-A 2.2098 eV<br>561.07 nm f=0.0654 <S**2>=0.000<br>189 -> 190 0.68649<br>189 -> 195 0.11389                                                                     | Excited State 13: Singlet-A 3.6545 eV<br>339.26 nm f=0.0352 <S**2>=0.000<br>186 -> 190 -0.12793<br>189 -> 198 0.28092<br>189 -> 199 0.60410<br>189 -> 200 -0.10075 |
| Excited State 2: Singlet-A 2.2308 eV<br>555.79 nm f=0.1679 <S**2>=0.000<br>188 -> 190 0.29986<br>189 -> 191 0.63034                                                                     | Excited State 14: Singlet-A 3.6925 eV<br>335.77 nm f=0.0012 <S**2>=0.000<br>189 -> 201 0.70606                                                                     |
| Excited State 3: Singlet-A 2.9151 eV<br>425.31 nm f=0.4895 <S**2>=0.000<br>188 -> 190 0.61237<br>189 -> 191 -0.26806<br>189 -> 194 -0.12492                                             | Excited State 15: Singlet-A 3.7592 eV<br>329.82 nm f=0.0326 <S**2>=0.000<br>187 -> 191 -0.11472<br>188 -> 192 0.67974<br>188 -> 195 0.11657                        |
| Excited State 4: Singlet-A 2.9596 eV<br>418.92 nm f=0.0047 <S**2>=0.000<br>189 -> 192 0.70026                                                                                           | Excited State 16: Singlet-A 3.7768 eV<br>328.28 nm f=0.0080 <S**2>=0.000<br>189 -> 202 0.69711                                                                     |
| Excited State 5: Singlet-A 3.1117 eV<br>398.45 nm f=0.0013 <S**2>=0.000<br>189 -> 193 0.66235<br>189 -> 194 0.24514                                                                     | Excited State 17: Singlet-A 3.8274 eV<br>323.94 nm f=0.0051 <S**2>=0.000<br>189 -> 203 0.70533                                                                     |
| Excited State 6: Singlet-A 3.1143 eV<br>398.12 nm f=0.0118 <S**2>=0.000<br>188 -> 191 0.66124<br>189 -> 195 -0.20019                                                                    | Excited State 18: Singlet-A 3.8937 eV<br>318.42 nm f=0.0003 <S**2>=0.000<br>188 -> 193 0.68761<br>188 -> 194 0.15909                                               |
| Excited State 7: Singlet-A 3.2881 eV<br>377.07 nm f=0.0040 <S**2>=0.000<br>189 -> 195 -0.35772<br>189 -> 196 0.59866                                                                    | Excited State 19: Singlet-A 3.9814 eV<br>311.41 nm f=0.0022 <S**2>=0.000<br>189 -> 204 0.67157<br>189 -> 206 0.21182                                               |
| Excited State 8: Singlet-A 3.3257 eV<br>372.81 nm f=0.0793 <S**2>=0.000<br>189 -> 193 -0.20722<br>189 -> 194 0.59212<br>189 -> 197 -0.23152                                             | Excited State 20: Singlet-A 4.0006 eV<br>309.92 nm f=0.0001 <S**2>=0.000<br>186 -> 191 0.32890<br>188 -> 193 -0.12085<br>188 -> 194 0.60749                        |
| Excited State 9: Singlet-A 3.4168 eV<br>362.86 nm f=0.0721 <S**2>=0.000<br>187 -> 190 -0.20963<br>188 -> 191 0.16453<br>189 -> 190 -0.10084<br>189 -> 195 0.52465<br>189 -> 196 0.35246 | Excited State 21: Singlet-A 4.0065 eV<br>309.46 nm f=0.0003 <S**2>=0.000<br>189 -> 205 0.70175                                                                     |
| Excited State 10: Singlet-A 3.4431 eV<br>360.10 nm f=0.0182 <S**2>=0.000<br>189 -> 194 0.19883<br>189 -> 197 0.65832                                                                    | Excited State 22: Singlet-A 4.0142 eV<br>308.87 nm f=0.0005 <S**2>=0.000<br>187 -> 191 0.45952<br>188 -> 195 0.53127                                               |
| Excited State 11: Singlet-A 3.5560 eV<br>348.67 nm f=0.0000 <S**2>=0.000<br>189 -> 198 0.63912<br>189 -> 199 -0.29656                                                                   | Excited State 23: Singlet-A 4.0587 eV<br>305.48 nm f=0.0581 <S**2>=0.000<br>187 -> 190 -0.35536<br>189 -> 204 -0.15310<br>189 -> 206 0.56804                       |
| Excited State 12: Singlet-A 3.6493 eV<br>339.75 nm f=0.0064 <S**2>=0.000<br>189 -> 200 0.69795                                                                                          | Excited State 24: Singlet-A 4.0741 eV<br>304.32 nm f=0.0577 <S**2>=0.000<br>187 -> 190 0.52901<br>189 -> 195 0.12681<br>189 -> 204 -0.14462<br>189 -> 206 0.34429  |

|                   |           |              |                   |           |              |
|-------------------|-----------|--------------|-------------------|-----------|--------------|
| Excited State 25: | Singlet-A | 4.0775 eV    | Excited State 35: | Singlet-A | 4.3392 eV    |
| 304.07 nm         | f=0.0046  | <S**2>=0.000 | 285.73 nm         | f=0.0001  | <S**2>=0.000 |
| 186 -> 190        |           | -0.23537     | 188 -> 198        |           | 0.61709      |
| 188 -> 196        |           | 0.37597      | 188 -> 199        |           | -0.34007     |
| 189 -> 207        |           | 0.52222      |                   |           |              |
|                   |           |              | Excited State 36: | Singlet-A | 4.3604 eV    |
| Excited State 26: | Singlet-A | 4.0793 eV    | 284.34 nm         | f=0.0003  | <S**2>=0.000 |
| 303.94 nm         | f=0.0003  | <S**2>=0.000 | 185 -> 190        |           | -0.29698     |
| 186 -> 190        |           | 0.16759      | 189 -> 213        |           | 0.63550      |
| 187 -> 191        |           | 0.12837      |                   |           |              |
| 188 -> 196        |           | 0.56567      | Excited State 37: | Singlet-A | 4.3942 eV    |
| 189 -> 207        |           | -0.35044     | 282.15 nm         | f=0.0200  | <S**2>=0.000 |
|                   |           |              | 184 -> 191        |           | -0.11963     |
| Excited State 27: | Singlet-A | 4.1478 eV    | 185 -> 190        |           | 0.60947      |
| 298.92 nm         | f=0.1235  | <S**2>=0.000 | 189 -> 213        |           | 0.27564      |
| 186 -> 190        |           | 0.50932      |                   |           |              |
| 189 -> 207        |           | 0.18956      | Excited State 38: | Singlet-A | 4.3951 eV    |
| 189 -> 208        |           | -0.39345     | 282.10 nm         | f=0.0018  | <S**2>=0.000 |
|                   |           |              | 189 -> 214        |           | 0.70255      |
| Excited State 28: | Singlet-A | 4.1754 eV    |                   |           |              |
| 296.94 nm         | f=0.0176  | <S**2>=0.000 | Excited State 39: | Singlet-A | 4.4298 eV    |
| 186 -> 190        |           | 0.14892      | 279.89 nm         | f=0.0155  | <S**2>=0.000 |
| 189 -> 207        |           | 0.10376      | 185 -> 191        |           | 0.12290      |
| 189 -> 208        |           | 0.26292      | 188 -> 200        |           | 0.68435      |
| 189 -> 209        |           | 0.61020      |                   |           |              |
| 189 -> 210        |           | 0.10574      | Excited State 40: | Singlet-A | 4.4417 eV    |
|                   |           |              | 279.14 nm         | f=0.0097  | <S**2>=0.000 |
| Excited State 29: | Singlet-A | 4.1829 eV    | 184 -> 190        |           | -0.23081     |
| 296.41 nm         | f=0.0293  | <S**2>=0.000 | 185 -> 191        |           | 0.57376      |
| 186 -> 190        |           | 0.18463      | 188 -> 200        |           | -0.15442     |
| 189 -> 207        |           | 0.15929      | 189 -> 215        |           | 0.27560      |
| 189 -> 208        |           | 0.44567      |                   |           |              |
| 189 -> 209        |           | -0.33624     | Excited State 41: | Singlet-A | 4.4494 eV    |
| 189 -> 210        |           | 0.33231      | 278.65 nm         | f=0.0885  | <S**2>=0.000 |
|                   |           |              | 185 -> 191        |           | -0.24812     |
| Excited State 30: | Singlet-A | 4.1988 eV    | 189 -> 215        |           | 0.63579      |
| 295.28 nm         | f=0.0137  | <S**2>=0.000 |                   |           |              |
| 186 -> 190        |           | -0.14541     | Excited State 42: | Singlet-A | 4.4791 eV    |
| 188 -> 197        |           | -0.39720     | 276.81 nm         | f=0.0049  | <S**2>=0.000 |
| 189 -> 207        |           | -0.10213     | 188 -> 201        |           | 0.70048      |
| 189 -> 208        |           | -0.19364     |                   |           |              |
| 189 -> 210        |           | 0.50807      | Excited State 43: | Singlet-A | 4.4850 eV    |
|                   |           |              | 276.44 nm         | f=0.0337  | <S**2>=0.000 |
| Excited State 31: | Singlet-A | 4.1996 eV    | 183 -> 190        |           | -0.28793     |
| 295.23 nm         | f=0.0077  | <S**2>=0.000 | 184 -> 190        |           | 0.56866      |
| 186 -> 190        |           | -0.10150     | 185 -> 191        |           | 0.22044      |
| 188 -> 197        |           | 0.58269      | 189 -> 216        |           | -0.12294     |
| 189 -> 208        |           | -0.14193     |                   |           |              |
| 189 -> 210        |           | 0.33687      | Excited State 44: | Singlet-A | 4.4881 eV    |
|                   |           |              | 276.25 nm         | f=0.0022  | <S**2>=0.000 |
| Excited State 32: | Singlet-A | 4.2438 eV    | 189 -> 216        |           | 0.68647      |
| 292.16 nm         | f=0.0005  | <S**2>=0.000 |                   |           |              |
| 189 -> 211        |           | 0.70550      | Excited State 45: | Singlet-A | 4.4981 eV    |
|                   |           |              | 275.64 nm         | f=0.0131  | <S**2>=0.000 |
| Excited State 33: | Singlet-A | 4.2737 eV    | 183 -> 190        |           | 0.63038      |
| 290.11 nm         | f=0.0042  | <S**2>=0.000 | 184 -> 190        |           | 0.28346      |
| 189 -> 212        |           | 0.70346      |                   |           |              |
|                   |           |              | Excited State 46: | Singlet-A | 4.5336 eV    |
| Excited State 34: | Singlet-A | 4.2945 eV    | 273.48 nm         | f=0.0212  | <S**2>=0.000 |
| 288.70 nm         | f=0.0008  | <S**2>=0.000 | 183 -> 191        |           | 0.10774      |
| 186 -> 191        |           | 0.42197      | 184 -> 191        |           | 0.63998      |
| 188 -> 194        |           | -0.17789     | 185 -> 190        |           | 0.11471      |
| 188 -> 198        |           | 0.28407      | 186 -> 191        |           | 0.10918      |
| 188 -> 199        |           | 0.43644      | 188 -> 199        |           | -0.12792     |

|                    |              |           |                    |              |           |
|--------------------|--------------|-----------|--------------------|--------------|-----------|
| Excited State 47:  | Singlet-A    | 4.5650 eV | 183 -> 191         | 0.28180      |           |
| 271.60 nm f=0.0013 | <S**2>=0.000 |           | 184 -> 191         | 0.10152      |           |
|                    |              |           | 186 -> 191         | -0.27934     |           |
|                    |              |           | 188 -> 194         | 0.15239      |           |
|                    |              |           | 188 -> 198         | 0.12446      |           |
|                    |              |           | 188 -> 199         | 0.28878      |           |
|                    |              |           | 188 -> 202         | 0.20212      |           |
|                    |              |           | 188 -> 205         | 0.11700      |           |
|                    |              |           | 189 -> 219         | 0.30531      |           |
|                    |              |           | 189 -> 221         | 0.12465      |           |
| Excited State 48:  | Singlet-A    | 4.5809 eV |                    |              |           |
| 270.65 nm f=0.0007 | <S**2>=0.000 |           | Excited State 55:  | Singlet-A    | 4.6872 eV |
|                    |              |           | 264.52 nm f=0.0931 | <S**2>=0.000 |           |
|                    |              |           | 181 -> 190         | 0.48795      |           |
|                    |              |           | 182 -> 191         | 0.41482      |           |
|                    |              |           | 187 -> 191         | 0.11040      |           |
|                    |              |           | 188 -> 195         | -0.10368     |           |
|                    |              |           | 189 -> 220         | 0.19534      |           |
| Excited State 49:  | Singlet-A    | 4.5852 eV |                    |              |           |
| 270.40 nm f=0.0179 | <S**2>=0.000 |           | Excited State 56:  | Singlet-A    | 4.6909 eV |
|                    |              |           | 264.31 nm f=0.0011 | <S**2>=0.000 |           |
|                    |              |           | 181 -> 190         | -0.13017     |           |
|                    |              |           | 182 -> 191         | -0.15710     |           |
|                    |              |           | 189 -> 220         | 0.67398      |           |
|                    |              |           | Excited State 57:  | Singlet-A    | 4.7274 eV |
| Excited State 50:  | Singlet-A    | 4.6012 eV | 262.26 nm f=0.0202 | <S**2>=0.000 |           |
| 269.46 nm f=0.0192 | <S**2>=0.000 |           | 181 -> 190         | -0.46928     |           |
|                    |              |           | 182 -> 191         | 0.48712      |           |
|                    |              |           | 188 -> 204         | 0.11148      |           |
|                    |              |           | Excited State 58:  | Singlet-A    | 4.7459 eV |
|                    |              |           | 261.25 nm f=0.0054 | <S**2>=0.000 |           |
| Excited State 51:  | Singlet-A    | 4.6089 eV | 189 -> 221         | 0.68031      |           |
| 269.01 nm f=0.0005 | <S**2>=0.000 |           | Excited State 59:  | Singlet-A    | 4.7590 eV |
|                    |              |           | 260.53 nm f=0.0021 | <S**2>=0.000 |           |
|                    |              |           | 188 -> 204         | 0.69097      |           |
|                    |              |           | Excited State 60:  | Singlet-A    | 4.7933 eV |
|                    |              |           | 258.66 nm f=0.0010 | <S**2>=0.000 |           |
| Excited State 52:  | Singlet-A    | 4.6287 eV | 181 -> 191         | -0.33481     |           |
| 267.86 nm f=0.0028 | <S**2>=0.000 |           | 188 -> 205         | 0.59213      |           |
|                    |              |           | 189 -> 222         | -0.15662     |           |
|                    |              |           |                    |              |           |
|                    |              |           |                    |              |           |
| Excited State 53:  | Singlet-A    | 4.6509 eV |                    |              |           |
| 266.58 nm f=0.0119 | <S**2>=0.000 |           |                    |              |           |
|                    |              |           |                    |              |           |
|                    |              |           |                    |              |           |
| Excited State 54:  | Singlet-A    | 4.6643 eV |                    |              |           |
| 265.82 nm f=0.0072 | <S**2>=0.000 |           |                    |              |           |
|                    |              |           |                    |              |           |
|                    |              |           |                    |              |           |

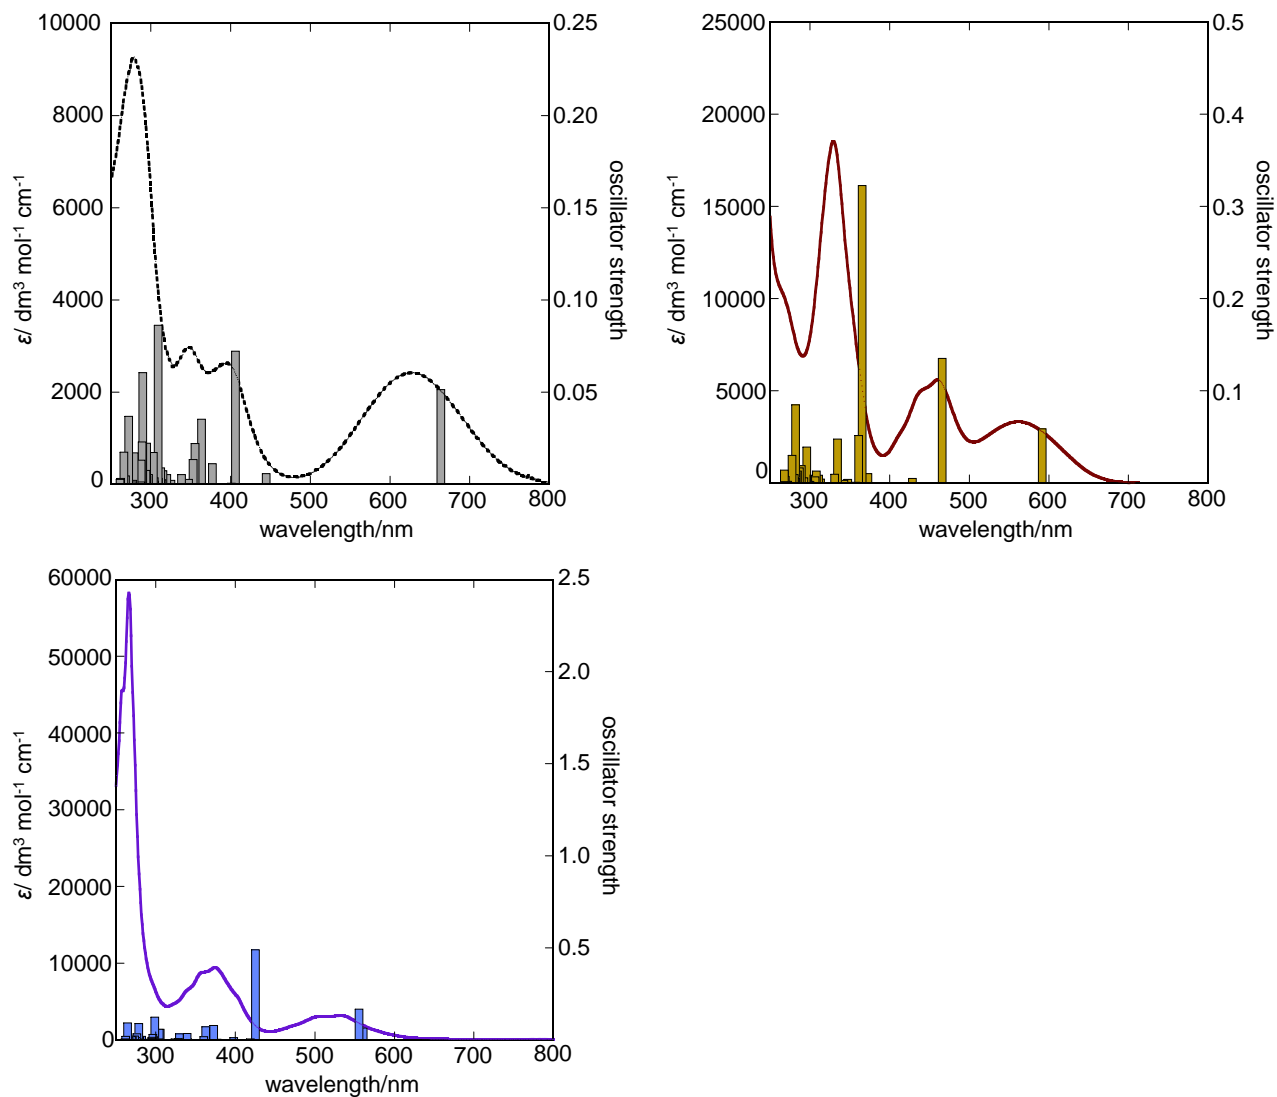

**Fig. S11** UV-vis spectra of **1a**<sup>S7</sup>, **3**, and **4** in hexane at room temperature. Superimposed vertical bars indicate band positions and oscillator strengths of each compounds calculated at the TD-HCTH407/6-31+G(d,p)//B3PW91+D3/6-31G(d) level of theory.

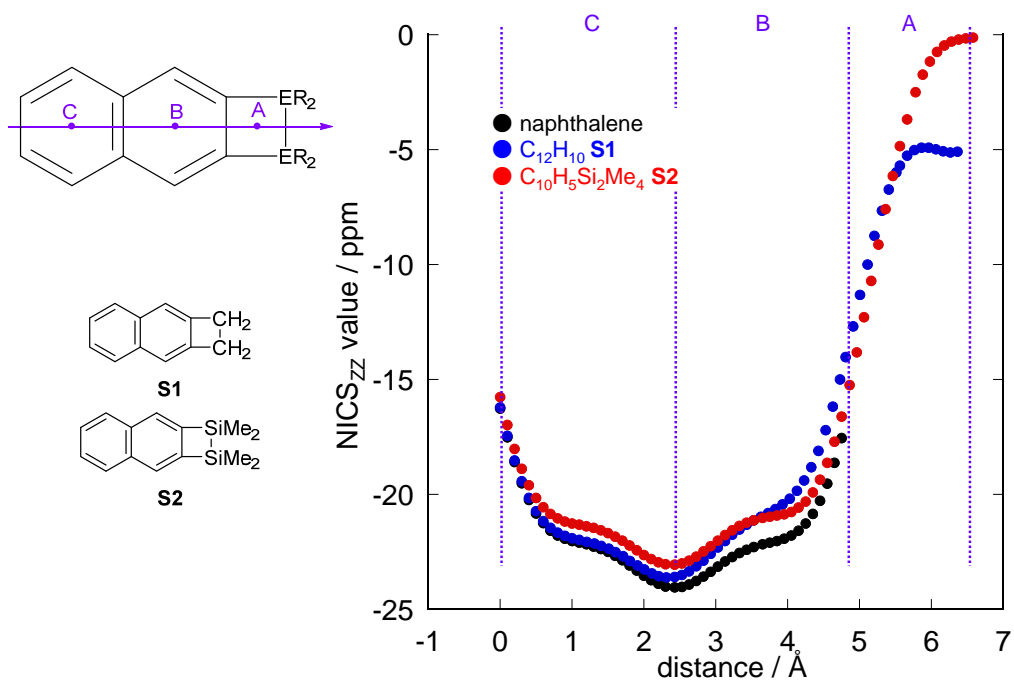

**Fig. S12** NICS<sub>zz</sub>-X scans for naphthalene, **S1**, and **S2**; trajectory for the NICS<sub>zz</sub> plots: trajectories are located 1.7 Å above the least square planes.

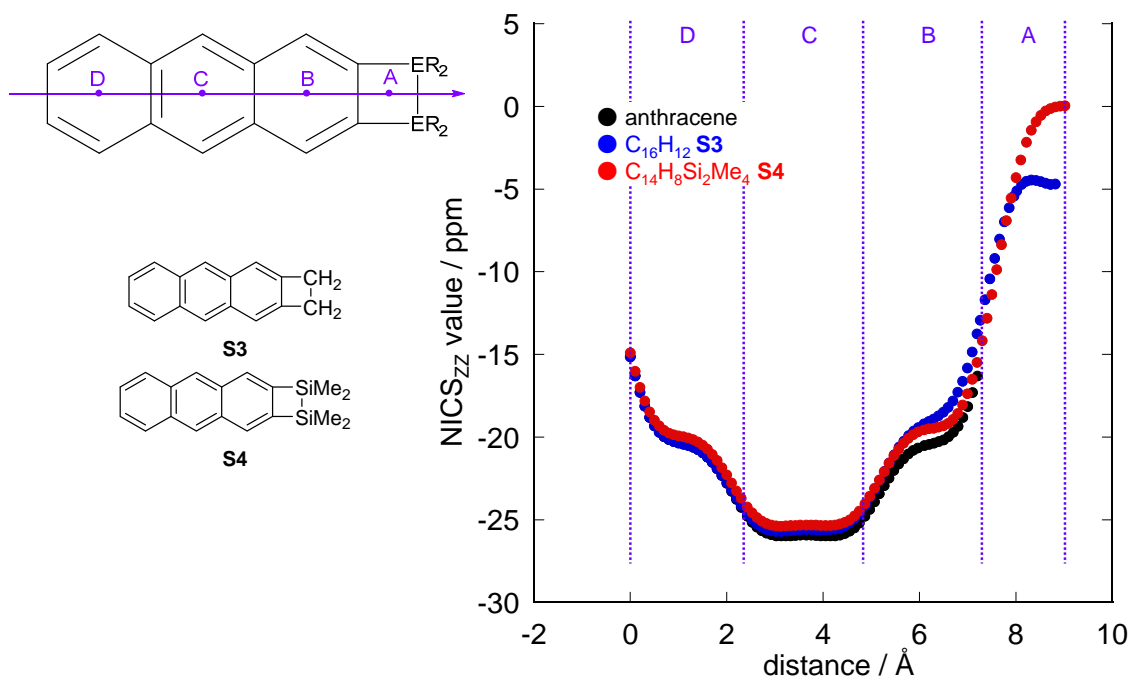

**Fig. S13** NICS<sub>zz</sub>-X scans for anthracene, **S3**, and **S4**; trajectory for the NICS<sub>zz</sub> plots: trajectories are located 1.7 Å above the least square planes.

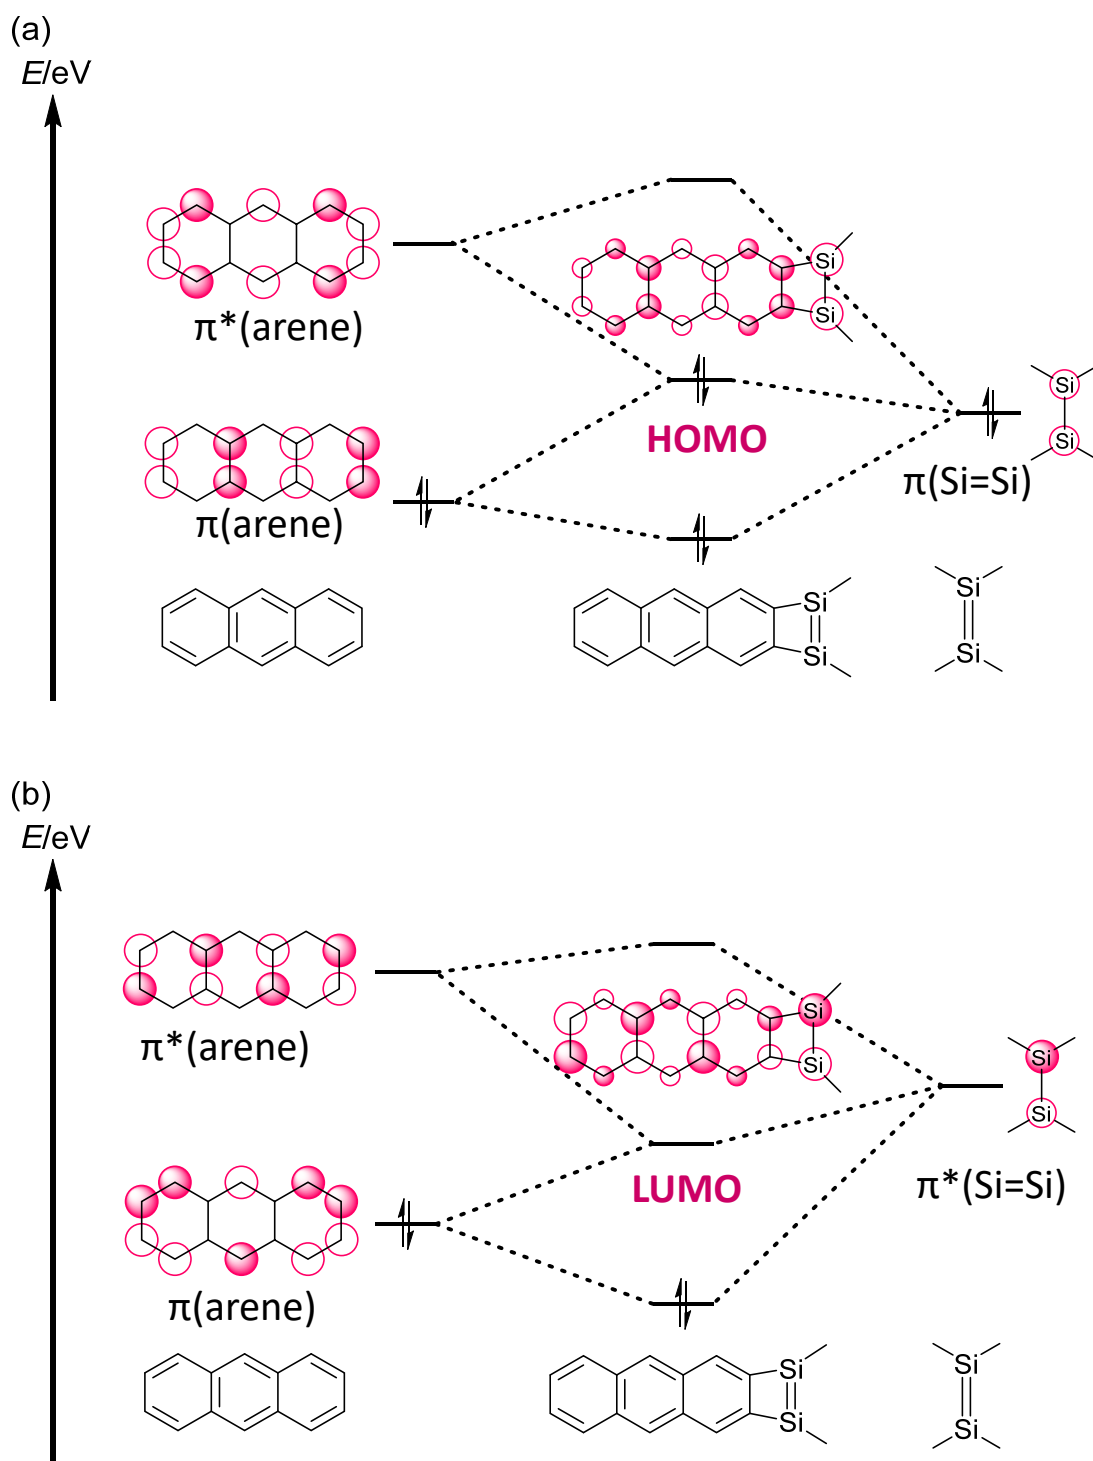

**Fig. S14** Diagrams for the orbital interactions to form the HOMO and LUMO of  $4_{\text{opt}}$ .

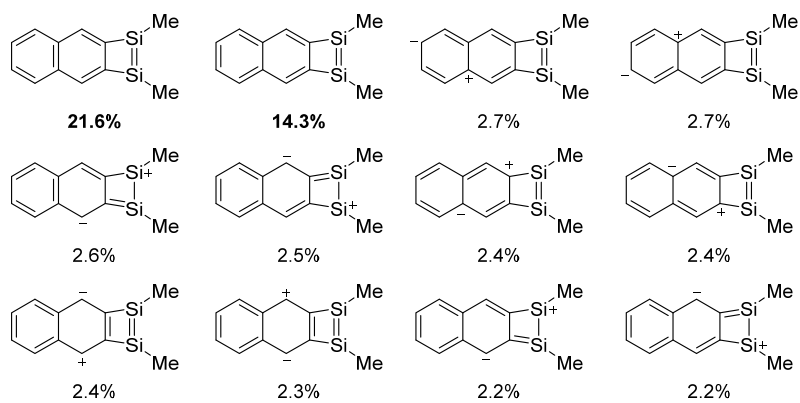

**Fig. S15** Major resonance structures of **3<sub>m</sub>** obtained by natural resonance theory analysis.

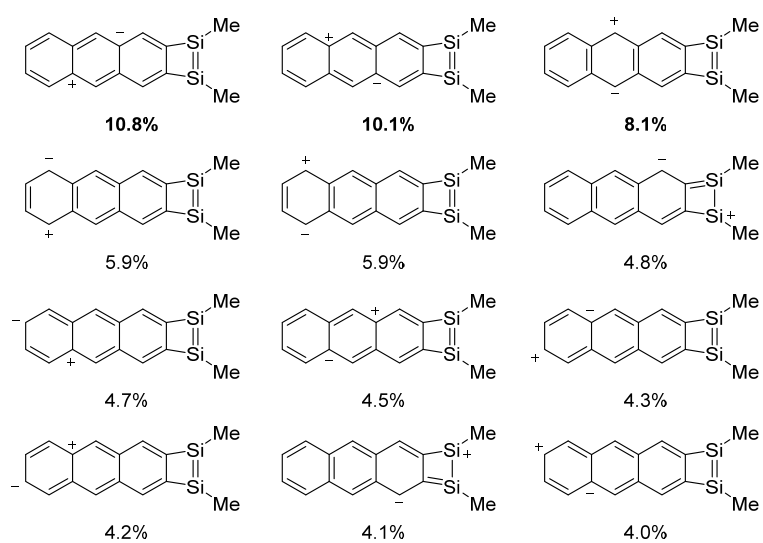

**Fig. S16** Major resonance structures of **4<sub>m</sub>** obtained by natural resonance theory analysis.

#### 4. References

- S1. G. R. Fulmer, A. J. M. Miller, N. H. Sherden, H. E. Gottlieb, A. Nudelman, B. M. Stoltz, J. E. Bercaw and K. I. Goldberg, *Organometallics*, 2010, **29**, 2176–2179.
- S2. S. Ishida, R. Sugawara, Y. Misawa and T. Iwamoto, *Angew. Chem. Int. Ed.*, 2013, **52**, 12869–12873.
- S3. M. R. Akula, *Org. Prep. Proced. Int.*, 1990, **22**, 102–104.
- S4. S. Ishida, Y. Misawa, S. Sugawara and T. Iwamoto, *Angew. Chem. Int. Ed.*, 2017, **56**, 13829–13832.
- S5. G. M. Sheldrick, SADABS, Empirical Absorption Correction Program; Göttingen, Germany, 1996.
- S6. G. M. Sheldrick, *Acta Cryst.* 2015, **C71**, 3–8.
- S7. Yadokari-XG 2009, Release of Software for Crystal Structure Analyses, C. Kabuto, S. Akine, T. Nemoto and E. Kwon, *J. Cryst. Soc. Jpn.* 2009, **51**, 218–224.
- S8. Gaussian 09, Revision D.01, M. J. Frisch, G. W. Trucks, H. B. Schlegel, G. E. Scuseria, M. A. Robb, J. R. Cheeseman, G. Scalmani, V. Barone, B. Mennucci, G. A. Petersson, H. Nakatsuji, M. Caricato, X. Li, H. P. Hratchian, A. F. Izmaylov, J. Bloino, G. Zheng, J. L. Sonnenberg, M. Hada, M. Ehara, K. Toyota, R. Fukuda, J. Hasegawa, M. Ishida, T. Nakajima, Y. Honda, O. Kitao, H. Nakai, T. Vreven, J. A. Montgomery, Jr., J. E. Peralta, F. Ogliaro, M. Bearpark, J. J. Heyd, E. Brothers, K. N. Kudin, V. N. Staroverov, T. Keith, R. Kobayashi, J. Normand, K. Raghavachari, A. Rendell, J. C. Burant, S. S. Iyengar, J. Tomasi, M. Cossi, N. Rega, J. M. Millam, M. Klene, J. E. Knox, J. B. Cross, V. Bakken, C. Adamo, J. Jaramillo, R. Gomperts, R. E. Stratmann, O. Yazyev, A. J. Austin, R. Cammi, C. Pomelli, J. W. Ochterski, R. L. Martin, K. Morokuma, V. G. Zakrzewski, G. A. Voth, P. Salvador, J. J. Dannenberg, S. Dapprich, A. D. Daniels, O. Farkas, J. B. Foresman, J. V. Ortiz, J. Cioslowski and D. J. Fox, Gaussian, Inc., Wallingford CT, 2013.
- S9. GRRM 14: S. Maeda, Y. Harabuchi, Y. Osada, T. Taketsugu, K. Morokuma and K. Ohno, see <http://grm.chem.tohoku.ac.jp/GRRM/>; S. Maeda, K. Ohno and K. Morokuma, *Phys. Chem. Chem. Phys.*, 2013, **15**, 3683–3701.
